# Supplementary material for: Vertical structure in chlorophyll profiles: influence on primary production in the Arctic Ocean
Source: Philos Trans A Math Phys Eng Sci. 2020 Aug 31;378(2181):20190351. doi: 10.1098/rsta.2019.0351 (PMC7481674; doi:10.1098/rsta.2019.0351)
Supplement: Table S1 [file rsta20190351supp1.xls]

## Sheet: TABLE_S1_BOUMAN-ptrsa.csv
Table S1 from Vertical Structure of Chlorophyll Profiles: Influence on Primary Production In the Arctic
Summary of the chlorophyll profile parameters obtained by fitting the shifted Gaussian function to chlorophyll profile data. Information on research cruise (CRUISE),
day number (DN), day of year (DAY), month of year (MONTH), year (YEAR), local time (TIME), latitude (LAT), longitude (LON), depth of the chlorophyll maximum (ZM),
background chlorophyll concentration (B0), peak area (H), and width (SIGMA).
CRUISE	DN	DAY	MONTH	YEAR	TIME	LAT	LON	ZM	B0	H	SIGMA
JR288 - ACCACIA	197	16	7	2013	1899-12-31 07:31:00	63.2999	-6.48615	4.044	1.561	4.421	3.215
JR288 - ACCACIA	197	16	7	2013	1899-12-31 14:17:00	63.2587	-6.52924	9.733	0.019	137.831	22.088
JR288 - ACCACIA	199	18	7	2013	1899-12-31 07:19:00	68.0534	-17.6959	35.233	0.104	53.816	30.375
JR288 - ACCACIA	199	18	7	2013	1899-12-31 14:10:00	68.0534	-17.5962	23.222	0.028	30.08	12.691
JR288 - ACCACIA	200	19	7	2013	1899-12-31 07:23:00	70.2249	-20.695	30.852	0.096	6.031	4.725
JR288 - ACCACIA	201	20	7	2013	1899-12-31 07:26:00	70.2346	-14.5882	45.293	0.074	18.332	17.029
JR288 - ACCACIA	201	20	7	2013	1899-12-31 14:06:00	70.2415	-14.7057	37.592	0.022	18.113	16.659
JR288 - ACCACIA	202	21	7	2013	1899-12-31 07:10:00	71.8951	-20.3059	20.383	0.07	3.687	9.143
JR288 - ACCACIA	202	21	7	2013	1899-12-31 14:00:00	71.7881	-20.1442	22.892	0.049	3.086	8.668
JR288 - ACCACIA	203	22	7	2013	1899-12-31 07:14:00	73.1057	-13.102	23.136	0.059	9.139	9.34
JR288 - ACCACIA	203	22	7	2013	1899-12-31 14:26:00	73.1111	-13.2405	23.251	0.016	10.47	5.626
JR288 - ACCACIA	204	23	7	2013	1899-12-31 07:10:00	74.8102	-17.6018	30.615	0.053	4.192	7.543
JR288 - ACCACIA	204	23	7	2013	1899-12-31 13:30:00	74.8138	-17.5843	30.094	0.031	5.715	8.285
JR288 - ACCACIA	205	24	7	2013	1899-12-31 07:14:00	75.0493	-8.72503	25.542	0.047	16.868	6.992
JR288 - ACCACIA	205	24	7	2013	1899-12-31 11:43:00	75.0528	-8.80574	41.507	0.015	16.44	16.559
JR288 - ACCACIA	206	25	7	2013	1899-12-31 07:28:00	76.5316	-15.5223	37.318	0.042	2.2	7.419
JR288 - ACCACIA	206	25	7	2013	1899-12-31 14:13:00	76.4915	-15.5181	40.87	0.031	4.076	8.323
JR288 - ACCACIA	207	26	7	2013	1899-12-31 07:19:00	76.269	-5.31069	22.091	0.049	9.215	7.043
JR288 - ACCACIA	207	26	7	2013	1899-12-31 12:02:00	76.2361	-5.42815	17.923	0.015	8.868	9.433
JR288 - ACCACIA	208	27	7	2013	1899-12-31 07:53:00	77.9563	-7.07203	16.735	0.086	12.008	2.59
JR288 - ACCACIA	208	27	7	2013	1899-12-31 14:03:00	77.9813	-7.16983	21.158	0.062	8.377	1.791
JR288 - ACCACIA	209	28	7	2013	1899-12-31 07:20:00	78.8943	-7.033	28.248	0.028	19.812	11.329
JR288 - ACCACIA	210	29	7	2013	1899-12-31 07:30:00	77.4538	-5.21757	22.88	0.02	9.122	11.758
JR288 - ACCACIA	210	29	7	2013	1899-12-31 23:02:00	77.2641	-1.6278	28.497	0.026	12.945	7.004
JR288 - ACCACIA	211	30	7	2013	1899-12-31 07:12:00	77.4426	3.43549	16.63	0.037	45.155	16.795
JR288 - ACCACIA	211	30	7	2013	1899-12-31 10:02:00	77.4238	3.44013	14.901	0.019	44.674	15.321
JR288 - ACCACIA	211	30	7	2013	1899-12-31 21:20:00	77.8387	9.50526	11.215	0.022	42.723	14.977
JR288 - ACCACIA	213	1	8	2013	1899-12-31 07:12:00	78.5323	5.37717	16.455	0.041	58.926	16.469
JR288 - ACCACIA	213	1	8	2013	1899-12-31 11:31:00	78.5475	5.40428	14.822	0.015	56.582	16.055
JR288 - ACCACIA	214	2	8	2013	1899-12-31 07:10:00	80.5839	10.7853	28.982	0.235	31.327	4.627
JR288 - ACCACIA	214	2	8	2013	1899-12-31 12:00:00	80.6126	10.7701	21.433	0.026	23.301	5.115
JR288 - ACCACIA	215	3	8	2013	1899-12-31 07:20:00	81.1335	24.1243	30.44	0.048	1.385	5.129
JR288 - ACCACIA	215	3	8	2013	1899-12-31 14:07:00	81.1343	23.944	74.491	0.045	1.985	0.43
JR288 - ACCACIA	216	4	8	2013	1899-12-31 07:10:00	83.3105	33.7313	45.74	0.064	6.203	12.742
JR288 - ACCACIA	216	4	8	2013	1899-12-31 11:35:00	83.324	33.7329	37.899	0.011	15.213	35.935
JR288 - ACCACIA	217	5	8	2013	1899-12-31 07:11:00	82.6832	26.1283	36.096	0.022	11.749	30.548
JR288 - ACCACIA	220	8	8	2013	1899-12-31 10:20:00	75.502	18.6587	28.594	0.098	6.368	6.322
JR288 - ACCACIA	221	9	8	2013	1899-12-31 10:04:00	76.7465	9.37214	8.386	0.028	22.872	12.692
JR219 - ICECHASER 2010	166	14	6	2010	1899-12-31 08:09:00	56.4121	1.31418	26.356	0.149	6.383	4.922
JR219 - ICECHASER 2010	167	15	6	2010	1899-12-31 09:25:00	60.7432	2.728	16.486	0.06	16.76	8.472
JR219 - ICECHASER 2010	168	16	6	2010	1899-12-31 07:36:00	65.0404	4.40058	8.6	0.044	43.987	19.233
JR219 - ICECHASER 2010	169	17	6	2010	1899-12-31 06:33:00	69.341	6.37383	11.279	0.054	35.898	13.39
JR219 - ICECHASER 2010	170	18	6	2010	1899-12-31 06:36:00	72.7553	8.26097	17.159	0.027	15.495	13.686
JR219 - ICECHASER 2010	171	19	6	2010	1899-12-31 07:43:00	77.157	11.2922	16.953	0.046	83.552	12.517
JR219 - ICECHASER 2010	174	23	6	2010	1899-12-31 11:05:00	80.7413	4.69883	51.406	0.028	21.924	11.914
JR219 - ICECHASER 2010	174	23	6	2010	1899-12-31 12:43:00	80.7413	4.65083	51.32	0.049	8.093	20.167
JR219 - ICECHASER 2010	174	23	6	2010	1899-12-31 14:04:00	80.7437	4.61233	59.387	0.034	20.858	9.47
JR219 - ICECHASER 2010	175	24	6	2010	1899-12-31 07:38:00	80.7042	4.34223	38.363	0.053	3.219	10.955
JR219 - ICECHASER 2010	175	24	6	2010	1899-12-31 09:26:00	80.6916	4.3181	36.72	0	6.786	20.244
JR219 - ICECHASER 2010	175	24	6	2010	1899-12-31 12:22:00	80.6768	4.248	36.246	0	6.744	21.247
JR219 - ICECHASER 2010	176	25	6	2010	1899-12-31 08:40:00	80.585	4.30483	53.375	0.023	11.903	16.583
JR219 - ICECHASER 2010	177	26	6	2010	1899-12-31 08:45:00	80.5182	4.1645	56.766	0.031	9.614	9.22
JR219 - ICECHASER 2010	178	27	6	2010	1899-12-31 07:40:00	80.4553	3.71728	39.784	0.023	6.864	23.836
JR219 - ICECHASER 2010	178	27	6	2010	1899-12-31 09:33:00	80.4397	3.66233	37.912	0.026	5.644	18.174
JR219 - ICECHASER 2010	179	28	6	2010	1899-12-31 07:37:00	80.3267	3.36967	28.469	0.02	3.906	15.944
JR219 - ICECHASER 2010	179	28	6	2010	1899-12-31 09:04:00	80.3163	3.32312	33.79	0.017	5.722	18.402
JR219 - ICECHASER 2010	180	29	6	2010	1899-12-31 08:01:00	80.2745	3.06125	75.33	0.014	12.518	47.527
JR219 - ICECHASER 2010	180	29	6	2010	1899-12-31 10:01:00	80.2697	2.98333	38.019	0.093	94.164	8.887
JR219 - ICECHASER 2010	180	29	6	2010	1899-12-31 11:34:00	80.2664	2.91913	34.829	0.013	71.293	4.811
JR219 - ICECHASER 2010	180	29	6	2010	1899-12-31 14:50:00	80.2605	2.82017	42.816	0.028	69.415	9.808
JR219 - ICECHASER 2010	181	30	6	2010	1899-12-31 08:42:00	80.2297	2.4965	34.305	0.02	61.99	9.522
JR219 - ICECHASER 2010	182	1	7	2010	1899-12-31 08:13:00	80.2198	2.16567	31.703	0.083	25.183	3.581
JR219 - ICECHASER 2010	182	1	7	2010	1899-12-31 10:12:00	80.1563	2.15633	32.966	0.019	35.596	5.555
JR219 - ICECHASER 2010	185	4	7	2010	1899-12-31 06:39:00	79.0167	10.7007	49.095	0.029	26.214	116.427
JR219 - ICECHASER 2010	185	4	7	2010	1899-12-31 08:01:00	79.0167	10.7008	84.81	0.034	16.629	84.585
JR219 - ICECHASER 2010	185	4	7	2010	1899-12-31 18:35:00	79.0143	10.6938	71.858	0.038	16.623	79.329
JR219 - ICECHASER 2010	186	5	7	2010	1899-12-31 06:42:00	79.0152	10.688	30.596	0.089	4.003	5.746
JR219 - ICECHASER 2010	186	5	7	2010	1899-12-31 12:33:00	79.0152	10.6885	29.179	0.091	9.01	1.328
JR219 - ICECHASER 2010	186	5	7	2010	1899-12-31 16:59:00	79	8.58525	30.314	0.101	30.446	4.132
JR219 - ICECHASER 2010	186	5	7	2010	1899-12-31 17:47:00	79.0003	8.47383	24.198	0.05	36.708	5.974
JR219 - ICECHASER 2010	186	5	7	2010	1899-12-31 18:49:00	79.0005	8.09667	27.872	0.036	43.776	14.937
JR219 - ICECHASER 2010	187	6	7	2010	1899-12-31 06:32:00	78.9753	6.70633	23.646	0.31	67.231	3.463
JR219 - ICECHASER 2010	187	6	7	2010	1899-12-31 07:58:00	78.9753	6.7065	18.118	0.081	47.702	8.514
JR219 - ICECHASER 2010	187	6	7	2010	1899-12-31 09:48:00	78.9752	6.70645	15.635	0.035	46.979	7.364
JR219 - ICECHASER 2010	187	6	7	2010	1899-12-31 13:16:00	78.9968	8.35617	18.698	0.049	18.511	5.81
JR219 - ICECHASER 2010	187	6	7	2010	1899-12-31 19:53:00	78.9751	6.70617	12.334	0.033	25.528	7.067
JR219 - ICECHASER 2010	188	7	7	2010	1899-12-31 06:55:00	78.9751	6.70632	23.037	0.078	53.26	8.314
JR219 - ICECHASER 2010	189	8	7	2010	1899-12-31 06:25:00	77.7875	5.58983	11.821	0.04	11.553	5.27
JR219 - ICECHASER 2010	189	8	7	2010	1899-12-31 07:43:00	77.7772	5.59617	13.818	0.052	7.83	4.076
JR219 - ICECHASER 2010	189	8	7	2010	1899-12-31 12:57:00	77.7166	5.6224	19.444	0.047	4.652	2.77
JR219 - ICECHASER 2010	189	8	7	2010	1899-12-31 14:22:00	77.696	5.61583	19.916	0	6.545	10.564
JR219 - ICECHASER 2010	190	9	7	2010	1899-12-31 22:08:00	77.6487	4.78017	44.252	0.03	42.691	6.529
JR219 - ICECHASER 2010	191	10	7	2010	1899-12-31 08:11:00	78.2833	0.00017	20.109	0.126	8.509	0.642
JR219 - ICECHASER 2010	191	10	7	2010	1899-12-31 09:24:00	78.2833	0.00025	10.755	0.115	22.706	1.086
JR219 - ICECHASER 2010	191	10	7	2010	1899-12-31 15:23:00	78.2833	0	19.026	0.028	12.018	2.367
JR219 - ICECHASER 2010	192	11	7	2010	1899-12-31 05:27:00	78.9475	5.28867	15.457	0.085	19.303	4.92
JR219 - ICECHASER 2010	193	12	7	2010	1899-12-31 15:05:00	78.9964	8.3519	26.68	0.032	84.413	28.275
JR219 - ICECHASER 2010	195	14	7	2010	1899-12-31 07:40:00	79.015	10.7275	35.589	0.066	10.256	15.417
JR219 - ICECHASER 2010	195	14	7	2010	1899-12-31 22:12:00	79.9443	8.937	52.462	0.027	34.201	28.696
JR219 - ICECHASER 2010	195	14	7	2010	1899-12-31 23:30:00	79.8993	9.36567	22.503	0.046	17.767	8.27
JR219 - ICECHASER 2010	196	15	7	2010	1899-12-31 00:33:00	79.8545	9.79617	15.03	0.068	18.243	5.321
JR219 - ICECHASER 2010	196	15	7	2010	1899-12-31 01:28:00	79.8277	10.033	25.758	0.086	22.475	7.413
JR219 - ICECHASER 2010	196	15	7	2010	1899-12-31 02:21:00	79.8102	10.1932	24.666	0.06	22.7	6.3
JR219 - ICECHASER 2010	196	15	7	2010	1899-12-31 03:13:00	79.7967	10.3415	24.775	0.065	14.059	3.707
JR219 - ICECHASER 2010	196	15	7	2010	1899-12-31 03:52:00	79.7853	10.4403	24.885	0.109	15.981	6.927
JR219 - ICECHASER 2010	196	15	7	2010	1899-12-31 04:32:00	79.7743	10.53	12.167	0.21	4.583	7.17
JR219 - ICECHASER 2010	196	15	7	2010	1899-12-31 09:09:00	79.8285	10.0208	28.212	0.112	20.483	7.48
JR219 - ICECHASER 2010	196	15	7	2010	1899-12-31 13:11:00	79.7309	11.09	38.027	0.099	27.065	24.637
JR219 - ICECHASER 2010	197	16	7	2010	1899-12-31 02:21:00	80	13.8003	19.985	0.182	17.967	9.618
JR219 - ICECHASER 2010	197	16	7	2010	1899-12-31 03:40:00	79.9334	14.1006	64.041	0	173.444	46.477
JR219 - ICECHASER 2010	197	16	7	2010	1899-12-31 04:45:00	79.8667	14.3012	47.669	0.148	76.513	14.392
JR219 - ICECHASER 2010	197	16	7	2010	1899-12-31 21:53:00	79.6838	13.8273	32.641	0.156	72.094	17.487
JR219 - ICECHASER 2010	197	16	7	2010	1899-12-31 23:02:00	79.767	14.1337	44.854	0.188	95.297	18.969
JR219 - ICECHASER 2010	198	17	7	2010	1899-12-31 01:15:00	80.042	13.299	17.38	0.145	10.529	3.985
JR219 - ICECHASER 2010	198	17	7	2010	1899-12-31 16:05:00	80.0798	17.2805	45.739	0.116	64.781	22.531
JR219 - ICECHASER 2010	198	17	7	2010	1899-12-31 21:10:00	80.1125	12.7953	58.035	0.293	39.32	10.207
JR219 - ICECHASER 2010	198	17	7	2010	1899-12-31 22:22:00	80.1698	12.1732	-8.167	0.106	75.198	58.789
JR219 - ICECHASER 2010	198	17	7	2010	1899-12-31 23:22:00	80.2217	11.6168	10.609	0.064	31.778	25.101
JR219 - ICECHASER 2010	199	18	7	2010	1899-12-31 00:18:00	80.2658	11.115	9.369	0.046	13.469	15.897
JR219 - ICECHASER 2010	199	18	7	2010	1899-12-31 00:52:00	80.2783	10.9598	13.216	0.044	10.566	14.377
JR219 - ICECHASER 2010	199	18	7	2010	1899-12-31 01:29:00	80.2923	10.7993	19.913	0.03	15.747	20.555
JR219 - ICECHASER 2010	199	18	7	2010	1899-12-31 02:11:00	80.3118	10.5812	37.793	0.029	29.114	22.886
JR219 - ICECHASER 2010	199	18	7	2010	1899-12-31 03:07:00	80.3322	10.3152	21.003	0.028	11.429	14.462
JR219 - ICECHASER 2010	199	18	7	2010	1899-12-31 04:09:00	80.361	10.001	28.321	0.073	81.308	5.045
WOCE1997	154	3	6	1997	NA	62.22	-57.3	25.67	0.077	36.16	9.25
WOCE1997	153	2	6	1997	NA	61.37	-50	17	0.625	527.83	14.89
WOCE1997	152	1	6	1997	NA	61.29	-50.06	29.15	0	1780.49	54.63
WOCE1997	152	1	6	1997	NA	61.28	-50.23	37.8	9.415	72.94	21.49
WOCE1997	152	1	6	1997	NA	61.02	-50.74	17.97	0	996.95	32.13
WOCE1996	317	12	11	1996	NA	61.01	-58.01	24.35	0	47.28	42.29
91007	146	26	5	1991	NA	60.87	-48.08	12.96	0	157.99	25.51
82027	231	19	8	1982	NA	60.8	-64.32	-7.88	0.547	326.1	30.27
2002-064	294	21	10	2002	NA	60.75	-62.09	9.66	0.059	26.07	24.05
WOCE1996	302	28	10	1996	NA	60.58	-48.21	7.06	0.409	216.81	12.85
2001-022	159	8	6	2001	NA	60.57	-48.26	27.77	1.639	293.91	10.95
2002-032	189	8	7	2002	NA	60.57	-48.22	15.94	0.217	41.95	23.01
2004-016	147	26	5	2004	NA	60.57	-48.23	60.23	6.516	27.44	6.64
2005-016	149	29	5	2005	NA	60.57	-48.23	42.51	0.178	6.93	6.69
2003-038	209	28	7	2003	NA	60.56	-48.22	7.69	0.072	23.13	5.34
91007	146	26	5	1991	NA	60.53	-48.09	18.12	0.377	72.03	21.6
91007	146	26	5	1991	NA	60.53	-48.09	26.62	0	82.53	18.86
WOCE1997	141	21	5	1997	NA	60.47	-48.42	10.14	1.94	540.76	17.55
dwls1985	261	18	9	1985	NA	60.45	-63.25	11.5	0.741	52.71	14.43
LS1999	189	8	7	1999	NA	60.45	-48.38	5.25	0.308	5.47	5.59
2001-022	159	8	6	2001	NA	60.45	-48.36	-0.29	0.221	280.86	12.18
2002-032	189	8	7	2002	NA	60.45	-48.36	19.19	0.416	12.94	10.1
2003-038	209	28	7	2003	NA	60.45	-48.37	6.02	0.054	32.2	6.82
2005-016	149	29	5	2005	NA	60.45	-48.36	31.62	1.33	24.58	12.02
JGOFS94	150	30	5	1994	NA	60.4	-48.6	8.36	0.243	25.49	6.58
JGOFS95	194	13	7	1995	NA	60.4	-48.52	34.85	0	42.65	48.99
WOCE1997	141	21	5	1997	NA	60.39	-48.6	14.18	0.631	301.04	15.68
JGOF1996	145	24	5	1996	NA	60.37	-48.45	14.22	0.892	168.61	9.56
2001-022	159	8	6	2001	NA	60.37	-48.45	4.39	0.239	201.02	9.43
2003-038	210	29	7	2003	NA	60.37	-48.45	-1.64	0.114	125.46	16.9
2004-016	147	26	5	2004	NA	60.37	-48.48	7.39	1.32	283.5	13.38
2005-016	150	30	5	2005	NA	60.37	-48.46	6.65	0.281	497.18	41.57
WOCE1996	302	28	10	1996	NA	60.36	-48.41	2.6	0.166	5.81	16.97
dwls1985	260	17	9	1985	NA	60.32	-62.03	15.2	0.258	78.4	16.56
LS1999	188	7	7	1999	NA	60.3	-48.57	60.09	0.339	3.14	8.78
2001-022	159	8	6	2001	NA	60.29	-48.54	9.76	1.776	21.2	12.06
2002-075	340	6	12	2002	NA	60.25	-48.82	2.52	0.133	0.28	10.78
2000-009	153	1	6	2000	NA	60.24	-48.64	23.59	0.389	553.65	16.1
JGOF1996	145	24	5	1996	NA	60.19	-48.76	54.92	1.44	6.16	6.55
LS1999	189	8	7	1999	NA	60.18	-48.69	17.73	0.238	29.18	7.3
dwls1985	260	17	9	1985	NA	60.17	-61.07	27.95	0.258	75.64	21.78
WOCE1997	151	31	5	1997	NA	60.07	-52.47	16.97	0.138	274.54	22.6
2000-009	153	1	6	2000	NA	60.04	-48.88	14.45	1.644	420.99	16.27
LS1999	188	7	7	1999	NA	60.01	-48.88	19.03	0.09	21.38	28.26
