# Supplementary material for: Vertical structure in chlorophyll profiles: influence on primary production in the Arctic Ocean
Source: Philos Trans A Math Phys Eng Sci. 2020 Aug 31;378(2181):20190351. doi: 10.1098/rsta.2019.0351 (PMC7481674; doi:10.1098/rsta.2019.0351)
Supplement: Table S2 [file rsta20190351supp2.xls]

## Sheet: PE_ARCTIC_PTRS-A
Table S2 from Vertical Structure of Chlorophyll Profiles: Influence on Primary Production In the Arctic
Summary of the photosynthesis-irradiance parameters obtained by fitting the equation of Platt et al. [28] to 14C incubation experiments. Information on research cruise and location (CRUISEID),
latitude (LAT), longitude (LON), depth (m), year (YEAR), month of year (MONTH), day of year (DAY), chlorophyll-a concentration (TCHL), initial slope (ALPHA), assimilation number (PMB).
CRUISEID	DATA SOURCE	LAT	LON	DEPTH	YEAR	MONTH	DAY	TCHL	ALPHA	PMB
JG96MAY: LABRADOR SEA	https://doi.org/10.1594/PANGAEA.874087	60.19	-48.76	50	1996	5	24	1.73	0.0291577	1.207
JG96MAY: LABRADOR SEA	https://doi.org/10.1594/PANGAEA.874087	60.19	-48.76	30	1996	5	24	1.43	0.0173961	1.629
JG96MAY: LABRADOR SEA	https://doi.org/10.1594/PANGAEA.874087	60.19	-48.76	10	1996	5	24	1.59	0.0158112	1.553
JG96MAY: LABRADOR SEA	https://doi.org/10.1594/PANGAEA.874087	60.37	-48.45	10	1996	5	24	5.5	0.0144998	0.896
JG97MAY LABRADOR SEA	https://doi.org/10.1594/PANGAEA.874087	60.066	-52.466	0	1997	5	31	4.37	0.016557	2.83
JG97MAY LABRADOR SEA	https://doi.org/10.1594/PANGAEA.874087	60.066	-52.466	0	1997	5	31	4.54	0.021219	1.8
JG97MAY LABRADOR SEA	https://doi.org/10.1594/PANGAEA.874087	61.02	-50.739	0	1997	6	1	9.77	0.040191	2.59
JG97MAY LABRADOR SEA	https://doi.org/10.1594/PANGAEA.874087	60.391	-48.603	2	1997	5	21	9.59	0.023697	2.71
JG97MAY LABRADOR SEA	https://doi.org/10.1594/PANGAEA.874087	60.391	-48.603	20	1997	5	21	6.75	0.016145	3.42
JG97MAY LABRADOR SEA	https://doi.org/10.1594/PANGAEA.874087	61.02	-50.739	2	1997	6	1	10.3	0.023619	2.7
JG97MAY LABRADOR SEA	https://doi.org/10.1594/PANGAEA.874087	61.02	-50.739	30	1997	6	1	10.66	0.023028	1.86
JG97MAY LABRADOR SEA	https://doi.org/10.1594/PANGAEA.874087	62.216	-57.304	20	1997	6	3	0.93	0.018556	1.15
JG97MAY LABRADOR SEA	https://doi.org/10.1594/PANGAEA.874087	62.216	-57.304	40	1997	6	3	0.38	0.023762	1.53
HUDJUN99 LABRADOR SEA	https://doi.org/10.1594/PANGAEA.874087	60.3	-48.57	40	1999	7	7	0.315	0.026179	2.27
HUDJUN99 LABRADOR SEA	https://doi.org/10.1594/PANGAEA.874087	60.3	-48.57	20	1999	7	7	0.366	0.014637	2.83
HUDJUN99 LABRADOR SEA	https://doi.org/10.1594/PANGAEA.874087	60.3	-48.57	10	1999	7	7	0.417	0.016625	2.79
HUDJUN99 LABRADOR SEA	https://doi.org/10.1594/PANGAEA.874087	60.18	-48.69	20	1999	7	8	1.506	0.024577	3.39
HUDJUN99 LABRADOR SEA	https://doi.org/10.1594/PANGAEA.874087	60.18	-48.69	10	1999	7	8	0.995	0.022891	3.42
HUDJUN99 LABRADOR SEA	https://doi.org/10.1594/PANGAEA.874087	60.18	-48.69	5	1999	7	8	0.881	0.024777	3.87
LABSEA2000: LABRADOR SEA	https://doi.org/10.1594/PANGAEA.874087	60.04	-48.89	40	2000	6	1	4.13	0.061608	1.41
LABSEA2000: LABRADOR SEA	https://doi.org/10.1594/PANGAEA.874087	60.04	-48.89	10	2000	6	1	11.29	0.023738	1.55
HUDJUN01 LABRADOR SEA	https://doi.org/10.1594/PANGAEA.874087	60.57	-48.26	40	2001	6	8	10.28	0.023213	1.39
HUDJUN01 LABRADOR SEA	https://doi.org/10.1594/PANGAEA.874087	60.57	-48.26	20	2001	6	8	10.82	0.027735	1.55
HUDJUN01 LABRADOR SEA	https://doi.org/10.1594/PANGAEA.874087	60.57	-48.26	10	2001	6	8	6.6	0.019168	1.34
HUD2002 LABRADOR SEA	https://doi.org/10.1594/PANGAEA.874087	60.18	-48.68	20	2002	12	6	0.138	0.055793	2.98
HUD2002 LABRADOR SEA	https://doi.org/10.1594/PANGAEA.874087	60.18	-48.68	1	2002	12	6	0.144	0.059972	3.07
18HU77024-BAFFIN77	https://doi.org/10.1594/PANGAEA.874087	73.7	-64.58	30	1977	9	3	0.48	0.03125	0.98
18HU77024-BAFFIN77	https://doi.org/10.1594/PANGAEA.874087	73.7	-64.58	10	1977	9	3	0.18	0.028	1.9
18HU77024-BAFFIN77	https://doi.org/10.1594/PANGAEA.874087	72.23	-65.95	30	1977	9	4	0.28	0.04475	1.2
18HU77024-BAFFIN77	https://doi.org/10.1594/PANGAEA.874087	72.23	-65.95	10	1977	9	4	0.1	0.04975	3.52
18HU77024-BAFFIN77	https://doi.org/10.1594/PANGAEA.874087	71.41	-70.15	30	1977	9	5	1.6	0.0295	0.81
18HU77024-BAFFIN77	https://doi.org/10.1594/PANGAEA.874087	71.41	-70.15	10	1977	9	5	0.12	0.0345	2.92
18HU77024-BAFFIN77	https://doi.org/10.1594/PANGAEA.874087	71.42	-70.65	30	1977	9	6	3.5	0.0215	0.88
18HU77024-BAFFIN77	https://doi.org/10.1594/PANGAEA.874087	71.42	-70.65	10	1977	9	6	0.2	0.03675	2.93
18HU77024-BAFFIN77	https://doi.org/10.1594/PANGAEA.874087	73.7	-70.5	30	1977	9	7	2.54	0.0125	0.45
18HU77024-BAFFIN77	https://doi.org/10.1594/PANGAEA.874087	73.7	-70.5	10	1977	9	7	0.28	0.022	1.66
18HU77024-BAFFIN77	https://doi.org/10.1594/PANGAEA.874087	73.78	-81.96	30	1977	9	8	0.71	0.022	0.95
18HU77024-BAFFIN77	https://doi.org/10.1594/PANGAEA.874087	73.78	-81.96	10	1977	9	8	0.25	0.02875	1.81
18HU77024-BAFFIN77	https://doi.org/10.1594/PANGAEA.874087	73.98	-90.05	30	1977	9	10	0.46	0.03675	2.07
18HU77024-BAFFIN77	https://doi.org/10.1594/PANGAEA.874087	73.98	-90.05	10	1977	9	10	0.33	0.0495	3.89
18HU77024-BAFFIN77	https://doi.org/10.1594/PANGAEA.874087	74.3	-81.86	30	1977	9	11	2.92	0.013	0.42
18HU77024-BAFFIN77	https://doi.org/10.1594/PANGAEA.874087	74.3	-81.86	10	1977	9	11	0.42	0.01825	1.18
18HU77024-BAFFIN77	https://doi.org/10.1594/PANGAEA.874087	75.86	-83.83	30	1977	9	13	0.32	0.04975	2.08
18HU77024-BAFFIN77	https://doi.org/10.1594/PANGAEA.874087	75.86	-83.83	10	1977	9	13	0.17	0.063	3.16
18HU77024-BAFFIN77	https://doi.org/10.1594/PANGAEA.874087	78.34	-73.66	30	1977	9	15	4.22	0.02325	0.67
18HU77024-BAFFIN77	https://doi.org/10.1594/PANGAEA.874087	78.34	-73.66	10	1977	9	15	5.49	0.02125	0.87
18HU78026-78026	https://doi.org/10.1594/PANGAEA.874087	60.8617	-56.2433	27	1978	8	30	1.21	0.0127	2.14
18HU78026-78026	https://doi.org/10.1594/PANGAEA.874087	60.8617	-56.2433	4	1978	8	30	1.08	0.02055	2.72
18HU78026-78026	https://doi.org/10.1594/PANGAEA.874087	63.65	-56.6	0	1978	8	31	2	0.016	1.79
18HU78026-78026	https://doi.org/10.1594/PANGAEA.874087	67.38	-58.65	54	1978	9	1	0.09	0.020025	0.71
18HU78026-78026	https://doi.org/10.1594/PANGAEA.874087	67.38	-58.65	8	1978	9	1	0.23	0.016875	2.14
18HU78026-78026	https://doi.org/10.1594/PANGAEA.874087	69.5633	-65.3833	27	1978	9	2	2.09	0.00395	0.61
18HU78026-78026	https://doi.org/10.1594/PANGAEA.874087	69.5633	-65.3833	8	1978	9	2	1.33	0.013525	1.17
18HU78026-78026	https://doi.org/10.1594/PANGAEA.874087	71.6233	-69.305	30	1978	9	3	4.07	0.0148	0.8
18HU78026-78026	https://doi.org/10.1594/PANGAEA.874087	71.6233	-69.305	4	1978	9	3	0.37	0.01755	0.93
18HU78026-78026	https://doi.org/10.1594/PANGAEA.874087	71.5883	-70.0417	30	1978	9	4	3.9	0.009325	1.03
18HU78026-78026	https://doi.org/10.1594/PANGAEA.874087	71.5883	-70.0417	4	1978	9	4	0.42	0.01735	1.18
18HU78026-78026	https://doi.org/10.1594/PANGAEA.874087	71.3083	-70.62	30	1978	9	5	3.78	0.00815	0.96
18HU78026-78026	https://doi.org/10.1594/PANGAEA.874087	71.3083	-70.62	4	1978	9	5	0.39	0.01295	1.24
18HU78026-78026	https://doi.org/10.1594/PANGAEA.874087	71.6833	-71.2333	17.5	1978	9	6	1.26	0.011	1.11
18HU78026-78026	https://doi.org/10.1594/PANGAEA.874087	72.255	-72.18	33	1978	9	7	3.7	0.01095	0.81
18HU78026-78026	https://doi.org/10.1594/PANGAEA.874087	72.255	-72.18	5	1978	9	7	0.31	0.0144	1.25
18HU78026-78026	https://doi.org/10.1594/PANGAEA.874087	71.8033	-72.2983	30	1978	9	8	2.75	0.0137	0.84
18HU78026-78026	https://doi.org/10.1594/PANGAEA.874087	71.8033	-72.2983	4	1978	9	8	0.31	0.0236	1.43
18HU78026-78026	https://doi.org/10.1594/PANGAEA.874087	72.7467	-73.6483	30	1978	9	9	2.03	0.0093	0.63
18HU78026-78026	https://doi.org/10.1594/PANGAEA.874087	72.7467	-73.6483	4	1978	9	9	0.44	0.01675	1.15
18HU78026-78026	https://doi.org/10.1594/PANGAEA.874087	73.7867	-79.9883	3	1978	9	10	4.44	0.017625	1.14
18HU78026-78026	https://doi.org/10.1594/PANGAEA.874087	73.7867	-79.9883	24	1978	9	10	5.64	0.0102	1.21
18HU78026-78026	https://doi.org/10.1594/PANGAEA.874087	74.765	-78.025	36	1978	9	11	0.67	0.01225	0.65
18HU78026-78026	https://doi.org/10.1594/PANGAEA.874087	74.765	-78.025	5	1978	9	11	0.58	0.012675	0.98
18HU78026-78026	https://doi.org/10.1594/PANGAEA.874087	74.5367	-76.0717	10	1978	9	12	2.16	0.009225	0.82
18HU78026-78026	https://doi.org/10.1594/PANGAEA.874087	74.5367	-76.0717	0	1978	9	12	0.63	0.015725	1.48
18HU78026-78026	https://doi.org/10.1594/PANGAEA.874087	75.9683	-74.345	36	1978	9	13	0.7	0.00435	0.44
18HU78026-78026	https://doi.org/10.1594/PANGAEA.874087	75.9683	-74.345	5	1978	9	13	1.39	0.0128	1.23
18HU78026-78026	https://doi.org/10.1594/PANGAEA.874087	74.9867	-68.0183	45	1978	9	14	0.76	0.01435	0.54
18HU78026-78026	https://doi.org/10.1594/PANGAEA.874087	74.9867	-68.0183	7	1978	9	14	0.94	0.0188	1.52
18SN79423-LSL79 - 79014	https://doi.org/10.1594/PANGAEA.874087	61.92	-55.85	10	1979	7	16	1.26	0.0086	2.34
18SN79423-LSL79 - 79014	https://doi.org/10.1594/PANGAEA.874087	66.35	-56.52	10	1979	7	17	1.89	0.0138	3.13
18SN79423-LSL79 - 79014	https://doi.org/10.1594/PANGAEA.874087	70.83	-57.39	10	1979	7	18	0.36	0.026275	4.12
18SN79423-LSL79 - 79014	https://doi.org/10.1594/PANGAEA.874087	74.59	-63.9	10	1979	7	19	0.35	0.010875	4.68
18SN79423-LSL79 - 79014	https://doi.org/10.1594/PANGAEA.874087	74.57	-76.82	10	1979	7	20	1	0.1032	2.51
18SN79423-LSL79 - 79014	https://doi.org/10.1594/PANGAEA.874087	73.75	-83.93	0	1979	7	21	1.89	0.002925	0.4
18SN79423-LSL79 - 79014	https://doi.org/10.1594/PANGAEA.874087	73.64	-83.9	0	1979	7	22	1.26	0.03515	2.49
18SN79423-LSL79 - 79014	https://doi.org/10.1594/PANGAEA.874087	73.64	-83.91	0	1979	7	22	1.58	0.020475	3.08
18SN79423-LSL79 - 79014	https://doi.org/10.1594/PANGAEA.874087	73.62	-83.92	0	1979	7	23	4.17	0.0095	2.02
18SN79423-LSL79 - 79014	https://doi.org/10.1594/PANGAEA.874087	73.56	-84.05	0	1979	7	24	4.29	0.00585	0.46
18SN79423-LSL79 - 79014	https://doi.org/10.1594/PANGAEA.874087	73.48	-83.3	0	1979	7	24	1.07	0.00625	0.74
18SN79423-LSL79 - 79014	https://doi.org/10.1594/PANGAEA.874087	73.47	-84.37	0	1979	7	25	0.65	0.014725	2.34
18SN79423-LSL79 - 79014	https://doi.org/10.1594/PANGAEA.874087	73.28	-85.27	0	1979	7	28	1.47	0.004825	1.03
18SN79423-LSL79 - 79014	https://doi.org/10.1594/PANGAEA.874087	73.07	-84.44	0	1979	7	29	0.5	0.0111	4.22
18SN79423-LSL79 - 79014	https://doi.org/10.1594/PANGAEA.874087	73.69	-83.6	0	1979	7	30	0.25	0.011275	2.2
18SN79423-LSL79 - 79014	https://doi.org/10.1594/PANGAEA.874087	73.69	-83.6	0	1979	7	31	0.54	0.00155	0.24
18SN79423-LSL79 - 79014	https://doi.org/10.1594/PANGAEA.874087	73.72	-83.7	0	1979	8	1	1.45	0.014075	1.94
18SN79423-LSL79 - 79014	https://doi.org/10.1594/PANGAEA.874087	73.6	-83.9	0	1979	8	2	1.18	0.013075	2.38
18SN79423-LSL79 - 79014	https://doi.org/10.1594/PANGAEA.874087	73.72	-83.53	0	1979	8	3	0.32	0.011	2.4
18SN79423-LSL79 - 79014	https://doi.org/10.1594/PANGAEA.874087	74.54	-82.45	0	1979	8	4	2.16	0.0061	1.64
18SN79423-LSL79 - 79014	https://doi.org/10.1594/PANGAEA.874087	74.54	-82.45	0	1979	8	5	1.55	0.009675	3.62
18SN79423-LSL79 - 79014	https://doi.org/10.1594/PANGAEA.874087	74.53	-80.07	10	1979	8	6	1.14	0.0591	1.5
18SN79423-LSL79 - 79014	https://doi.org/10.1594/PANGAEA.874087	74.6	-79.81	10	1979	8	7	2.23	0.014425	2.18
18SN79423-LSL79 - 79014	https://doi.org/10.1594/PANGAEA.874087	75.59	-83.95	10	1979	8	8	1.12	0.01195	1.76
18SN79423-LSL79 - 79014	https://doi.org/10.1594/PANGAEA.874087	73.33	-85.42	10	1979	8	9	2.48	0.0122	3.05
18SN79423-LSL79 - 79014	https://doi.org/10.1594/PANGAEA.874087	74.79	-79.02	10	1979	8	10	0.23	0.007825	1.49
18SN79423-LSL79 - 79014	https://doi.org/10.1594/PANGAEA.874087	74.75	-79.07	10	1979	8	11	0.2	0.0154	2.54
18SN79423-LSL79 - 79014	https://doi.org/10.1594/PANGAEA.874087	74.79	-79.03	10	1979	8	11	0.46	0.01035	2.72
18SN79423-LSL79 - 79014	https://doi.org/10.1594/PANGAEA.874087	74.78	-79.02	10	1979	8	12	0.45	0.00895	1.3
18SN79423-LSL79 - 79014	https://doi.org/10.1594/PANGAEA.874087	74.78	-79.02	10	1979	8	12	0.56	0.006025	1.81
18SN79423-LSL79 - 79014	https://doi.org/10.1594/PANGAEA.874087	74.78	-79.02	10	1979	8	12	0.46	0.013875	2.79
18SN79423-LSL79 - 79014	https://doi.org/10.1594/PANGAEA.874087	74.58	-79.77	10	1979	8	14	0.26	0.006875	1.04
18SN79423-LSL79 - 79014	https://doi.org/10.1594/PANGAEA.874087	74.69	-79.36	10	1979	8	15	3.2	0.009975	1.38
18SN79423-LSL79 - 79014	https://doi.org/10.1594/PANGAEA.874087	74.53	-82.45	10	1979	8	17	10.96	0.0078	1.15
18SN79423-LSL79 - 79014	https://doi.org/10.1594/PANGAEA.874087	74.53	-82.45	10	1979	8	18	3.74	0.016975	3.32
18SN79423-LSL79 - 79014	https://doi.org/10.1594/PANGAEA.874087	74.53	-82.46	10	1979	8	19	5.29	0.006825	1.17
18SN79423-LSL79 - 79014	https://doi.org/10.1594/PANGAEA.874087	74.53	-82.46	10	1979	8	20	4.74	0.00405	0.69
18SN79423-LSL79 - 79014	https://doi.org/10.1594/PANGAEA.874087	74.53	-82.46	10	1979	8	21	2.69	0.035575	3.27
18SN79423-LSL79 - 79014	https://doi.org/10.1594/PANGAEA.874087	74.53	-82.46	10	1979	8	22	6.66	0.02035	1.96
18SN79423-LSL79 - 79014	https://doi.org/10.1594/PANGAEA.874087	74.53	-82.46	10	1979	8	23	3.66	0.024875	2.71
18SN79423-LSL79 - 79014	https://doi.org/10.1594/PANGAEA.874087	75.79	-80.33	10	1979	8	24	3.79	0.01185	1.13
18SN79423-LSL79 - 79014	https://doi.org/10.1594/PANGAEA.874087	77.47	-89.36	0	1979	8	25	0.36	0.00625	0.96
18SN79423-LSL79 - 79014	https://doi.org/10.1594/PANGAEA.874087	77.56	-89.32	0	1979	8	26	3.51	0.009475	0.82
18SN79423-LSL79 - 79014	https://doi.org/10.1594/PANGAEA.874087	77.78	-89.53	0	1979	8	27	0.55	0.019475	3.56
18SN79423-LSL79 - 79014	https://doi.org/10.1594/PANGAEA.874087	79.98	-86.06	0	1979	8	28	0.22	0.01615	2.55
18SN79423-LSL79 - 79014	https://doi.org/10.1594/PANGAEA.874087	78.85	-85.42	0	1979	8	29	0.27	0.0173	2.91
18SN79423-LSL79 - 79014	https://doi.org/10.1594/PANGAEA.874087	76.13	-85.95	0	1979	8	30	1.39	0.017275	2.31
18SN79423-LSL79 - 79014	https://doi.org/10.1594/PANGAEA.874087	73.69	-83.45	0	1979	9	1	0.34	0.002875	0.45
18SN79423-LSL79 - 79014	https://doi.org/10.1594/PANGAEA.874087	72.71	-78	10	1979	9	2	0.26	0.010675	3.08
18SN79423-LSL79 - 79014	https://doi.org/10.1594/PANGAEA.874087	72.71	-78	10	1979	9	3	0.38	0.014775	2.15
18SN79423-LSL79 - 79014	https://doi.org/10.1594/PANGAEA.874087	72.7	-78.04	10	1979	9	4	0.7	0.034175	4.55
18SN79423-LSL79 - 79014	https://doi.org/10.1594/PANGAEA.874087	72.7	-78.28	0	1979	9	5	0.59	0.0251	4.63
18SN79423-LSL79 - 79014	https://doi.org/10.1594/PANGAEA.874087	74.54	-82.45	10	1979	9	7	4.6	0.0235	1.63
18SN79423-LSL79 - 79014	https://doi.org/10.1594/PANGAEA.874087	74.54	-82.45	10	1979	9	7	2.38	0.0359	1.81
18SN79423-LSL79 - 79014	https://doi.org/10.1594/PANGAEA.874087	74.54	-82.45	10	1979	9	8	6.16	0.026975	1.48
18SN79423-LSL79 - 79014	https://doi.org/10.1594/PANGAEA.874087	74.54	-82.45	10	1979	9	8	2.34	0.03705	2.29
18SN79423-LSL79 - 79014	https://doi.org/10.1594/PANGAEA.874087	74.54	-82.45	10	1979	9	9	8.47	0.017225	1.3
18SN79423-LSL79 - 79014	https://doi.org/10.1594/PANGAEA.874087	74.54	-82.45	10	1979	9	9	2.71	0.039675	3.02
18SN79423-LSL79 - 79014	https://doi.org/10.1594/PANGAEA.874087	74.54	-82.45	10	1979	9	10	2.07	0.034675	2.77
18SN79423-LSL79 - 79014	https://doi.org/10.1594/PANGAEA.874087	74.58	-83.18	10	1979	9	11	1.55	0.035125	1.67
18SN79423-LSL79 - 79014	https://doi.org/10.1594/PANGAEA.874087	74.45	-83.08	10	1979	9	13	3.84	0.016625	3.42
18SN79423-LSL79 - 79014	https://doi.org/10.1594/PANGAEA.874087	74.59	-83.19	10	1979	9	14	0.99	0.02485	3.72
18SN79423-LSL79 - 79014	https://doi.org/10.1594/PANGAEA.874087	72.71	-78.02	10	1979	9	15	1.07	0.033625	1.06
18SN79423-LSL79 - 79014	https://doi.org/10.1594/PANGAEA.874087	72.71	-78.02	10	1979	9	15	1.09	0.037225	1.65
18SN79423-LSL79 - 79014	https://doi.org/10.1594/PANGAEA.874087	72.71	-78.02	10	1979	9	16	1.19	0.020275	1.08
18SN79423-LSL79 - 79014	https://doi.org/10.1594/PANGAEA.874087	72.71	-78.02	10	1979	9	16	1.24	0.02735	1.75
18SN79423-LSL79 - 79014	https://doi.org/10.1594/PANGAEA.874087	74.65	-94.75	10	1979	9	18	1.03	0.0077	2.06
18SN79423-LSL79 - 79014	https://doi.org/10.1594/PANGAEA.874087	73.08	-84.57	10	1979	9	19	0.27	0.024	3.72
18SN79423-LSL79 - 79014	https://doi.org/10.1594/PANGAEA.874087	73.67	-80.87	10	1979	9	20	3.21	0.01505	2.33
18SN79423-LSL79 - 79014	https://doi.org/10.1594/PANGAEA.874087	73.67	-80.87	10	1979	9	22	3.28	0.0121	1.2
18SN79423-LSL79 - 79014	https://doi.org/10.1594/PANGAEA.874087	73.67	-80.87	10	1979	9	22	2.81	0.0108	1.34
18SN79423-LSL79 - 79014	https://doi.org/10.1594/PANGAEA.874087	73.67	-80.87	10	1979	9	23	3.08	0.0174	2.79
18SN79423-LSL79 - 79014	https://doi.org/10.1594/PANGAEA.874087	73.67	-80.87	10	1979	9	23	3.34	0.025825	2.88
18SN79423-LSL79 - 79014	https://doi.org/10.1594/PANGAEA.874087	73.67	-80.87	10	1979	9	24	3.48	0.03695	2.83
18SN79423-LSL79 - 79014	https://doi.org/10.1594/PANGAEA.874087	73.08	-84.48	10	1979	9	27	0.74	0.05915	3
18SN79423-LSL79 - 79014	https://doi.org/10.1594/PANGAEA.874087	74.5	-92.77	0	1979	9	29	0.9	0.01265	1.56
18SN79423-LSL79 - 79014	https://doi.org/10.1594/PANGAEA.874087	73.97	-113.28	0	1979	10	1	0.12	0.013525	1.1
18SN79423-LSL79 - 79014	https://doi.org/10.1594/PANGAEA.874087	73.61	-113.83	0	1979	10	3	0.22	0.01515	1
18SN79423-LSL79 - 79014	https://doi.org/10.1594/PANGAEA.874087	72.24	-119.15	0	1979	10	5	0.5	0.016125	1.78
18SN79423-LSL79 - 79014	https://doi.org/10.1594/PANGAEA.874087	69.96	-133.33	10	1979	10	7	0.45	0.01385	1.88
18SN79423-LSL79 - 79014	https://doi.org/10.1594/PANGAEA.874087	69.96	-133.33	10	1979	10	7	0.38	0.017775	2.55
18SN79423-LSL79 - 79014	https://doi.org/10.1594/PANGAEA.874087	69.96	-133.33	10	1979	10	7	0.37	0.02655	3.33
18SN79423-LSL79 - 79014	https://doi.org/10.1594/PANGAEA.874087	69.96	-133.33	10	1979	10	8	0.27	0.0288	3.1
18SN79423-LSL79 - 79014	https://doi.org/10.1594/PANGAEA.874087	69.96	-133.33	10	1979	10	8	0.39	0.034325	3.34
18SN79423-LSL79 - 79014	https://doi.org/10.1594/PANGAEA.874087	71.13	-145.16	0	1979	10	9	1.08	0.0184	1.22
18SN79423-LSL79 - 79014	https://doi.org/10.1594/PANGAEA.874087	70.07	-164.9	0	1979	10	10	0.58	0.01305	1.42
18SN79423-LSL79 - 79014	https://doi.org/10.1594/PANGAEA.874087	67.03	-168.27	0	1979	10	11	2.81	0.018775	1.93
18SN79423-LSL79 - 79014	https://doi.org/10.1594/PANGAEA.874087	63.14	-167.13	0	1979	10	12	1.7	0.02635	1.91
18SN79423-LSL79 - 79014	https://doi.org/10.1594/PANGAEA.874087	61.34	-168.74	0	1979	10	12	1.66	0.1076	2.65
18HU83023-ARCTIC83	https://doi.org/10.1594/PANGAEA.874087	61.84	-57.9	10	1983	8	9	2.667	0.0425	0.94
18HU83023-ARCTIC83	https://doi.org/10.1594/PANGAEA.874087	64.16	-57.21	10	1983	8	10	2.299	0.0385	0.91
18HU83023-ARCTIC83	https://doi.org/10.1594/PANGAEA.874087	67.73	-57.05	40	1983	8	11	10.492	0.01975	0.77
18HU83023-ARCTIC83	https://doi.org/10.1594/PANGAEA.874087	71.24	-57.53	35	1983	8	12	0.813	0.02825	0.88
18HU83023-ARCTIC83	https://doi.org/10.1594/PANGAEA.874087	74.13	-63.02	25	1983	8	13	0.616	0.0325	1.11
18HU83023-ARCTIC83	https://doi.org/10.1594/PANGAEA.874087	75.13	-73.92	31	1983	8	14	8.169	0.0195	0.79
18HU83023-ARCTIC83	https://doi.org/10.1594/PANGAEA.874087	76.1	-82.42	18	1983	8	15	6.568	0.029	2.07
18HU83023-ARCTIC83	https://doi.org/10.1594/PANGAEA.874087	76.42	-83.08	22	1983	8	17	6.888	0.0255	1.04
18HU83023-ARCTIC83	https://doi.org/10.1594/PANGAEA.874087	76	-82.04	5	1983	8	19	12.174	0.0235	1.29
18HU83023-ARCTIC83	https://doi.org/10.1594/PANGAEA.874087	76.1	-82.43	30	1983	8	21	0.761	0.04	1.4
18HU83023-ARCTIC83	https://doi.org/10.1594/PANGAEA.874087	76.1	-82.43	50	1983	8	21	0.22	0.063	2.34
18HU83023-ARCTIC83	https://doi.org/10.1594/PANGAEA.874087	76.08	-82.16	12	1983	8	22	8.81	0.04075	2.17
18HU83023-ARCTIC83	https://doi.org/10.1594/PANGAEA.874087	74.12	-81.9	25	1983	8	23	1.594	0.02725	1.37
18HU83023-ARCTIC83	https://doi.org/10.1594/PANGAEA.874087	76.21	-82.57	9	1983	8	27	5.126	0.025	1.22
18HU83023-ARCTIC83	https://doi.org/10.1594/PANGAEA.874087	76.19	-71.88	35	1983	8	31	3.587	0.0425	0.87
18HU83023-ARCTIC83	https://doi.org/10.1594/PANGAEA.874087	74.75	-70.8	15	1983	9	3	2.759	0.015	0.66
18HU83023-ARCTIC83	https://doi.org/10.1594/PANGAEA.874087	74.75	-70.8	2	1983	9	3	0.165	0.043	5.13
18HU83023-ARCTIC83	https://doi.org/10.1594/PANGAEA.874087	73.4	-68.38	24	1983	9	4	8.73	0.01	0.43
18HU83023-ARCTIC83	https://doi.org/10.1594/PANGAEA.874087	71.92	-71.23	10	1983	9	5	0.157	0.11325	3.21
18HU83023-ARCTIC83	https://doi.org/10.1594/PANGAEA.874087	71.92	-71.23	2	1983	9	5	0.151	0.088	3.52
18HU83023-ARCTIC83	https://doi.org/10.1594/PANGAEA.874087	72.2	-65.7	10	1983	9	7	0.391	0.03125	2.11
18HU83023-ARCTIC83	https://doi.org/10.1594/PANGAEA.874087	72.2	-65.7	2	1983	9	7	0.246	0.0295	2.4
18HU83023-ARCTIC83	https://doi.org/10.1594/PANGAEA.874087	70.46	-68.59	25	1983	9	8	3.28	0.02525	1.58
18HU83023-ARCTIC83	https://doi.org/10.1594/PANGAEA.874087	72.06	-68.31	29	1983	9	9	11.613	0.042	1.46
18HU83023-ARCTIC83	https://doi.org/10.1594/PANGAEA.874087	72.06	-68.31	10	1983	9	9	0.325	0.052	2.24
18HU83023-ARCTIC83	https://doi.org/10.1594/PANGAEA.874087	72.06	-68.31	2	1983	9	9	0.203	0.06875	5.05
18HU83023-ARCTIC83	https://doi.org/10.1594/PANGAEA.874087	72.06	-68.31	28	1983	9	10	6.407	0.022	0.79
18HU83023-ARCTIC83	https://doi.org/10.1594/PANGAEA.874087	71.76	-74.53	45	1983	9	11	1.533	0.03025	0.72
18HU83023-ARCTIC83	https://doi.org/10.1594/PANGAEA.874087	71.76	-74.53	37	1983	9	11	5.847	0.03525	1.06
18HU83023-ARCTIC83	https://doi.org/10.1594/PANGAEA.874087	71.76	-74.53	20	1983	9	11	0.462	0.04375	2.26
18HU83023-ARCTIC83	https://doi.org/10.1594/PANGAEA.874087	71.76	-74.53	10	1983	9	11	0.411	0.06075	3.33
18HU83023-ARCTIC83	https://doi.org/10.1594/PANGAEA.874087	74.28	-73.66	39	1983	9	12	0.778	0.032	1.2
18HU83023-ARCTIC83	https://doi.org/10.1594/PANGAEA.874087	74.28	-73.66	2	1983	9	12	0.232	0.01775	1.78
18HU83023-ARCTIC83	https://doi.org/10.1594/PANGAEA.874087	74.28	-73.66	10	1983	9	12	0.258	0.02875	1.79
18BA84015-84015,JONESSND84	https://doi.org/10.1594/PANGAEA.874087	75.83	-87.33	50	1984	8	19	0.432	0.016075	0.6
18BA84015-84015,JONESSND84	https://doi.org/10.1594/PANGAEA.874087	75.83	-87.33	20	1984	8	19	4.74	0.01575	0.74
18BA84015-84015,JONESSND84	https://doi.org/10.1594/PANGAEA.874087	75.83	-87.33	15	1984	8	19	7.39	0.0272	0.99
18BA84015-84015,JONESSND84	https://doi.org/10.1594/PANGAEA.874087	75.83	-87.33	8	1984	8	19	9.6	0.0185	1.11
18BA84015-84015,JONESSND84	https://doi.org/10.1594/PANGAEA.874087	75.83	-87.33	2	1984	8	19	10.12	0.02315	1.13
18BA84015-84015,JONESSND84	https://doi.org/10.1594/PANGAEA.874087	76.75	-83.98	25	1984	8	20	4.62	0.01605	0.63
18BA84015-84015,JONESSND84	https://doi.org/10.1594/PANGAEA.874087	76.75	-83.98	50	1984	8	20	1.24	0.020775	0.64
18BA84015-84015,JONESSND84	https://doi.org/10.1594/PANGAEA.874087	76.75	-83.98	20	1984	8	20	4.79	0.0231	0.76
18BA84015-84015,JONESSND84	https://doi.org/10.1594/PANGAEA.874087	76.75	-83.98	12	1984	8	20	4.54	0.03195	0.89
18BA84015-84015,JONESSND84	https://doi.org/10.1594/PANGAEA.874087	76.75	-83.98	5	1984	8	20	0.821	0.018825	1.2
18BA84015-84015,JONESSND84	https://doi.org/10.1594/PANGAEA.874087	76.15	-84.05	59	1984	8	21	0.983	0.01375	0.58
18BA84015-84015,JONESSND84	https://doi.org/10.1594/PANGAEA.874087	76.15	-84.05	16	1984	8	21	0.942	0.0195	0.6
18BA84015-84015,JONESSND84	https://doi.org/10.1594/PANGAEA.874087	76.15	-84.05	24	1984	8	21	1.18	0.016025	0.63
18BA84015-84015,JONESSND84	https://doi.org/10.1594/PANGAEA.874087	76.15	-84.05	39	1984	8	21	1.45	0.0272	0.66
18BA84015-84015,JONESSND84	https://doi.org/10.1594/PANGAEA.874087	76.15	-84.05	84	1984	8	21	0.942	0.010625	0.85
18BA84015-84015,JONESSND84	https://doi.org/10.1594/PANGAEA.874087	76.15	-84.05	5	1984	8	21	0.169	0.011575	0.96
18BA84015-84015,JONESSND84	https://doi.org/10.1594/PANGAEA.874087	76.29	-88.55	25	1984	8	24	7.01	0.020725	0.74
18BA84015-84015,JONESSND84	https://doi.org/10.1594/PANGAEA.874087	76.2	-87.34	25	1984	8	25	3.42	0.0268	1.73
18BA84015-84015,JONESSND84	https://doi.org/10.1594/PANGAEA.874087	76.21	-83.89	35	1984	8	26	2.01	0.0229	0.52
18BA84015-84015,JONESSND84	https://doi.org/10.1594/PANGAEA.874087	76.21	-83.89	10	1984	8	26	0.271	0.0129	0.57
18BA84015-84015,JONESSND84	https://doi.org/10.1594/PANGAEA.874087	76.21	-83.89	23	1984	8	26	1.21	0.018475	0.57
18BA84015-84015,JONESSND84	https://doi.org/10.1594/PANGAEA.874087	76.21	-83.89	30	1984	8	26	1.56	0.0316	0.8
18BA84015-84015,JONESSND84	https://doi.org/10.1594/PANGAEA.874087	76.21	-83.89	45	1984	8	26	0.754	0.052375	2.05
18BA84015-84015,JONESSND84	https://doi.org/10.1594/PANGAEA.874087	75.81	-85.22	55	1984	8	27	2.97	0.0192	0.5
18BA84015-84015,JONESSND84	https://doi.org/10.1594/PANGAEA.874087	75.81	-85.22	40	1984	8	27	4.58	0.02035	0.64
18BA84015-84015,JONESSND84	https://doi.org/10.1594/PANGAEA.874087	75.81	-85.22	22	1984	8	27	9.47	0.017325	0.74
18BA84015-84015,JONESSND84	https://doi.org/10.1594/PANGAEA.874087	75.81	-85.22	15	1984	8	27	3.59	0.01925	1.13
18BA84015-84015,JONESSND84	https://doi.org/10.1594/PANGAEA.874087	75.81	-85.22	5	1984	8	27	1.35	0.0171	1.57
18BA84015-84015,JONESSND84	https://doi.org/10.1594/PANGAEA.874087	75.8	-86.04	30	1984	8	28	7.14	0.0235	0.5
18BA84015-84015,JONESSND84	https://doi.org/10.1594/PANGAEA.874087	75.8	-86.04	50	1984	8	28	2.93	0.018025	0.57
18BA84015-84015,JONESSND84	https://doi.org/10.1594/PANGAEA.874087	75.8	-86.04	5	1984	8	28	2.81	0.01985	0.79
18BA84015-84015,JONESSND84	https://doi.org/10.1594/PANGAEA.874087	75.8	-86.04	20	1984	8	28	6.55	0.0228	0.83
18BA84015-84015,JONESSND84	https://doi.org/10.1594/PANGAEA.874087	75.8	-86.04	15	1984	8	28	3.22	0.02695	0.88
18BA84015-84015,JONESSND84	https://doi.org/10.1594/PANGAEA.874087	75.88	-84.63	14	1984	8	29	4	0.01955	0.91
18BA84015-84015,JONESSND84	https://doi.org/10.1594/PANGAEA.874087	75.82	-86.97	19	1984	8	30	6.02	0.04935	1.68
18BA84015-84015,JONESSND84	https://doi.org/10.1594/PANGAEA.874087	76.17	-83.9	31	1984	9	1	6.15	0.0182	0.54
18BA84015-84015,JONESSND84	https://doi.org/10.1594/PANGAEA.874087	76.17	-83.9	20	1984	9	1	0.727	0.083875	1.3
18BA84015-84015,JONESSND84	https://doi.org/10.1594/PANGAEA.874087	76.17	-83.9	5	1984	9	1	0.499	0.0166	1.52
18BA84015-84015,JONESSND84	https://doi.org/10.1594/PANGAEA.874087	76.17	-83.9	25	1984	9	1	1.95	0.0276	1.58
18BA84015-84015,JONESSND84	https://doi.org/10.1594/PANGAEA.874087	76.58	-84.93	16	1984	9	2	2.31	0.0192	1.14
18BA84015-84015,JONESSND84	https://doi.org/10.1594/PANGAEA.874087	76.58	-84.93	25	1984	9	2	0.228	0.0295	1.51
18BA84015-84015,JONESSND84	https://doi.org/10.1594/PANGAEA.874087	74.57	-84.93	5	1984	9	2	2.6	0.115875	1.83
18BA84015-84015,JONESSND84	https://doi.org/10.1594/PANGAEA.874087	76.57	-84.93	15	1984	9	2	1.12	0.06015	2.13
18BA84015-84015,JONESSND84	https://doi.org/10.1594/PANGAEA.874087	76.58	-84.93	5	1984	9	2	3.88	0.091475	2.2
18BA84015-84015,JONESSND84	https://doi.org/10.1594/PANGAEA.874087	74.61	-84.93	25	1984	9	2	0.33	0.041225	3.98
18BA84015-84015,JONESSND84	https://doi.org/10.1594/PANGAEA.874087	76.35	-89.08	0	1984	9	3	0.389	0.066275	1.53
18BA84015-84015,JONESSND84	https://doi.org/10.1594/PANGAEA.874087	76.35	-89.08	50	1984	9	3	0.173	0.056175	2.68
HUD-2011-009	https://doi.org/10.1594/PANGAEA.871872	60.079	-48.787	2	2011	5	17	3.93	0.069	4.65
HUD-2009-015	https://doi.org/10.1594/PANGAEA.871872	60.3673	-48.456	2.2	2009	5	21	15.13	0.165	2.67
HUD-2009-015	https://doi.org/10.1594/PANGAEA.871872	60.5667	-48.2282	1.1	2009	5	21	16.53	0.13	1.91
HUD-2008-009	https://doi.org/10.1594/PANGAEA.871872	60.175	-48.6835	3.1	2008	5	23	1.81	0.052	2.7
HUD-2007-011	https://doi.org/10.1594/PANGAEA.871872	60.1668	-48.6668	2.3	2007	5	17	0.31	0.045	3.46
HUD-2007-011	https://doi.org/10.1594/PANGAEA.871872	60.4333	-48.35	2.3	2007	5	17	1.6	0.017	1.04
HUD-2007-011	https://doi.org/10.1594/PANGAEA.871872	61.3667	-50.0002	0.8	2007	5	18	2.5	0.035	2.78
HUD-2006-019	https://doi.org/10.1594/PANGAEA.871872	60.2905	-48.5497	2.7	2006	5	30	2.88	0.136	3.13
HUD-2006-019	https://doi.org/10.1594/PANGAEA.871872	60.1785	-48.677	2.6	2006	5	31	2.19	0.182	3.66
HUD-2005-16	https://doi.org/10.1594/PANGAEA.871872	60.2927	-48.5458	2.2	2005	5	29	3.12	0.048	1.79
HUD-2005-16	https://doi.org/10.1594/PANGAEA.871872	60.4493	-48.3625	2.4	2005	5	29	0.62	0.035	1.28
BARENTS_SEA_Norwegian_Institute_of_Marine_Research	https://doi.org/10.1594/PANGAEA.874087	76.33	30.5	5	1980	7	12	0.04	0.07	3.69
BARENTS_SEA_Norwegian_Institute_of_Marine_Research	https://doi.org/10.1594/PANGAEA.874087	76.33	30.5	20	1980	7	12	0.05	0.05	5.03
BARENTS_SEA_Norwegian_Institute_of_Marine_Research	https://doi.org/10.1594/PANGAEA.874087	76.33	30.5	35	1980	7	12	0.21	0.14	7.3
BARENTS_SEA_Norwegian_Institute_of_Marine_Research	https://doi.org/10.1594/PANGAEA.874087	74.05	31.12	0	1981	5	10	4.86	0.06	0.91
BARENTS_SEA_Norwegian_Institute_of_Marine_Research	https://doi.org/10.1594/PANGAEA.874087	74.05	31.12	7	1981	5	10	4.49	0.02	1.31
BARENTS_SEA_Norwegian_Institute_of_Marine_Research	https://doi.org/10.1594/PANGAEA.874087	74.05	31.12	25	1981	5	10	5.48	0.03	1.08
BARENTS_SEA_Norwegian_Institute_of_Marine_Research	https://doi.org/10.1594/PANGAEA.874087	74.05	31.12	0	1981	5	10	3.43	0.03	2.5
BARENTS_SEA_Norwegian_Institute_of_Marine_Research	https://doi.org/10.1594/PANGAEA.874087	74.05	31.12	7	1981	5	10	3.54	0.06	1.97
BARENTS_SEA_Norwegian_Institute_of_Marine_Research	https://doi.org/10.1594/PANGAEA.874087	74.05	31.12	25	1981	5	10	4.57	0.06	1.05
BARENTS_SEA_Norwegian_Institute_of_Marine_Research	https://doi.org/10.1594/PANGAEA.874087	74.05	31.12	0	1981	5	11	4.12	0.04	0.97
BARENTS_SEA_Norwegian_Institute_of_Marine_Research	https://doi.org/10.1594/PANGAEA.874087	74.05	31.12	7	1981	5	11	4.3	0.07	1.19
BARENTS_SEA_Norwegian_Institute_of_Marine_Research	https://doi.org/10.1594/PANGAEA.874087	74.05	31.12	25	1981	5	11	4.32	0.06	2.53
BARENTS_SEA_Norwegian_Institute_of_Marine_Research	https://doi.org/10.1594/PANGAEA.874087	74.05	31.12	0	1981	5	11	2.35	0.07	2.45
BARENTS_SEA_Norwegian_Institute_of_Marine_Research	https://doi.org/10.1594/PANGAEA.874087	74.05	31.12	7	1981	5	11	2.93	0.04	1.59
BARENTS_SEA_Norwegian_Institute_of_Marine_Research	https://doi.org/10.1594/PANGAEA.874087	74.05	31.12	25	1981	5	11	2.69	0.06	2.84
BARENTS_SEA_Norwegian_Institute_of_Marine_Research	https://doi.org/10.1594/PANGAEA.874087	74.05	31.12	0	1981	5	11	2.79	0.05	1.88
BARENTS_SEA_Norwegian_Institute_of_Marine_Research	https://doi.org/10.1594/PANGAEA.874087	74.05	31.12	7	1981	5	11	3.66	0.05	1.86
BARENTS_SEA_Norwegian_Institute_of_Marine_Research	https://doi.org/10.1594/PANGAEA.874087	74.05	31.12	25	1981	5	11	3.62	0.06	2.14
BARENTS_SEA_Norwegian_Institute_of_Marine_Research	https://doi.org/10.1594/PANGAEA.874087	74.05	31.12	0	1981	5	11	2.22	0.05	3.14
BARENTS_SEA_Norwegian_Institute_of_Marine_Research	https://doi.org/10.1594/PANGAEA.874087	74.05	31.12	7	1981	5	11	2.82	0.03	2.89
BARENTS_SEA_Norwegian_Institute_of_Marine_Research	https://doi.org/10.1594/PANGAEA.874087	74.05	31.12	25	1981	5	11	2.9	0.04	2.73
BARENTS_SEA_Norwegian_Institute_of_Marine_Research	https://doi.org/10.1594/PANGAEA.874087	73.5	30.48	30	1981	6	25	3.1	0.02	1.11
BARENTS_SEA_Norwegian_Institute_of_Marine_Research	https://doi.org/10.1594/PANGAEA.874087	74.82	30.5	25	1981	6	26	0.5	0.03	3.17
BARENTS_SEA_Norwegian_Institute_of_Marine_Research	https://doi.org/10.1594/PANGAEA.874087	75.87	32.45	45	1981	6	29	5.38	0.03	0.57
BARENTS_SEA_Norwegian_Institute_of_Marine_Research	https://doi.org/10.1594/PANGAEA.874087	76.78	33.13	20	1981	7	4	0.6	0.01	0.55
BARENTS_SEA_Norwegian_Institute_of_Marine_Research	https://doi.org/10.1594/PANGAEA.874087	76.67	33.07	30	1981	7	5	7.98	0.04	1.04
BARENTS_SEA_Norwegian_Institute_of_Marine_Research	https://doi.org/10.1594/PANGAEA.874087	74	31.18	30	1981	7	7	1.43	0.02	1.38
BARENTS_SEA_Norwegian_Institute_of_Marine_Research	https://doi.org/10.1594/PANGAEA.874087	77	35	0	1981	8	12	0.2	0.03	0.54
BARENTS_SEA_Norwegian_Institute_of_Marine_Research	https://doi.org/10.1594/PANGAEA.874087	77	35	34	1981	8	12	0.08	0.04	1.57
BARENTS_SEA_Norwegian_Institute_of_Marine_Research	https://doi.org/10.1594/PANGAEA.874087	76	35	0	1981	8	14	0.1	0.02	5.05
BARENTS_SEA_Norwegian_Institute_of_Marine_Research	https://doi.org/10.1594/PANGAEA.874087	76	35	32	1981	8	14	0.26	0.02	1.04
BARENTS_SEA_Norwegian_Institute_of_Marine_Research	https://doi.org/10.1594/PANGAEA.874087	77	29	0	1981	8	15	0.09	0.04	3.1
BARENTS_SEA_Norwegian_Institute_of_Marine_Research	https://doi.org/10.1594/PANGAEA.874087	73.82	73.1	5	1982	5	27	6.32	0.02	0.92
BARENTS_SEA_Norwegian_Institute_of_Marine_Research	https://doi.org/10.1594/PANGAEA.874087	74.75	22.73	0	1982	5	30	5.34	0.04	2.26
BARENTS_SEA_Norwegian_Institute_of_Marine_Research	https://doi.org/10.1594/PANGAEA.874087	74.35	21.62	0	1982	5	31	4.36	0.04	2.71
BARENTS_SEA_Norwegian_Institute_of_Marine_Research	https://doi.org/10.1594/PANGAEA.874087	74.35	21.62	22	1982	5	31	6.08	0.02	1.36
BARENTS_SEA_Norwegian_Institute_of_Marine_Research	https://doi.org/10.1594/PANGAEA.874087	76.05	23.35	0	1982	6	2	2.62	0.05	3.01
BARENTS_SEA_Norwegian_Institute_of_Marine_Research	https://doi.org/10.1594/PANGAEA.874087	76	26	0	1982	6	3	6.53	0.01	1.06
BARENTS_SEA_Norwegian_Institute_of_Marine_Research	https://doi.org/10.1594/PANGAEA.874087	76	26	20	1982	6	3	8.63	0.01	1.1
BARENTS_SEA_Norwegian_Institute_of_Marine_Research	https://doi.org/10.1594/PANGAEA.874087	76.2	32.53	0	1982	6	4	0.28	0.01	0.57
BARENTS_SEA_Norwegian_Institute_of_Marine_Research	https://doi.org/10.1594/PANGAEA.874087	75.25	16.58	0	1983	5	26	0.77	0.04	3.23
BARENTS_SEA_Norwegian_Institute_of_Marine_Research	https://doi.org/10.1594/PANGAEA.874087	75.25	16.58	20	1983	5	26	0.44	0.12	3.34
BARENTS_SEA_Norwegian_Institute_of_Marine_Research	https://doi.org/10.1594/PANGAEA.874087	75.25	18.8	0	1983	5	26	3.78	0.02	1.77
BARENTS_SEA_Norwegian_Institute_of_Marine_Research	https://doi.org/10.1594/PANGAEA.874087	75.25	17	0	1983	5	26	1.59	0.07	1.82
BARENTS_SEA_Norwegian_Institute_of_Marine_Research	https://doi.org/10.1594/PANGAEA.874087	74.87	22.33	0	1983	5	27	0.66	0.04	2.02
BARENTS_SEA_Norwegian_Institute_of_Marine_Research	https://doi.org/10.1594/PANGAEA.874087	74.12	24.7	20	1983	5	27	1.27	0.05	5
BARENTS_SEA_Norwegian_Institute_of_Marine_Research	https://doi.org/10.1594/PANGAEA.874087	74.12	24.7	50	1983	5	27	1.97	0.07	3.05
BARENTS_SEA_Norwegian_Institute_of_Marine_Research	https://doi.org/10.1594/PANGAEA.874087	76	22	10	1983	5	28	6.6	0.05	2.12
BARENTS_SEA_Norwegian_Institute_of_Marine_Research	https://doi.org/10.1594/PANGAEA.874087	76.18	22	10	1983	5	28	7.98	0.04	1.61
BARENTS_SEA_Norwegian_Institute_of_Marine_Research	https://doi.org/10.1594/PANGAEA.874087	76.18	22	30	1983	5	28	0.63	0.02	1.05
BARENTS_SEA_Norwegian_Institute_of_Marine_Research	https://doi.org/10.1594/PANGAEA.874087	76.18	22	10	1983	5	28	8.7	0.03	1.88
BARENTS_SEA_Norwegian_Institute_of_Marine_Research	https://doi.org/10.1594/PANGAEA.874087	76.18	22	10	1983	5	28	8.7	0.05	1.63
BARENTS_SEA_Norwegian_Institute_of_Marine_Research	https://doi.org/10.1594/PANGAEA.874087	76.18	22	20	1983	5	28	3.59	0.03	1.54
BARENTS_SEA_Norwegian_Institute_of_Marine_Research	https://doi.org/10.1594/PANGAEA.874087	76.18	22	10	1983	5	28	6.16	0.08	3.09
BARENTS_SEA_Norwegian_Institute_of_Marine_Research	https://doi.org/10.1594/PANGAEA.874087	76.18	22	20	1983	5	28	4.74	0.08	3.78
BARENTS_SEA_Norwegian_Institute_of_Marine_Research	https://doi.org/10.1594/PANGAEA.874087	76.18	22	10	1983	5	29	6.69	0.06	2.75
BARENTS_SEA_Norwegian_Institute_of_Marine_Research	https://doi.org/10.1594/PANGAEA.874087	76.18	22	20	1983	5	29	0.58	0.08	3.25
BARENTS_SEA_Norwegian_Institute_of_Marine_Research	https://doi.org/10.1594/PANGAEA.874087	76.18	22	10	1983	5	29	8.8	0.03	1.64
BARENTS_SEA_Norwegian_Institute_of_Marine_Research	https://doi.org/10.1594/PANGAEA.874087	76.18	22	20	1983	5	29	2.58	0.01	2.18
BARENTS_SEA_Norwegian_Institute_of_Marine_Research	https://doi.org/10.1594/PANGAEA.874087	76.4	22	10	1983	5	30	4.99	0.05	1.46
BARENTS_SEA_Norwegian_Institute_of_Marine_Research	https://doi.org/10.1594/PANGAEA.874087	76.4	22	10	1983	5	30	6.52	0.03	1.81
BARENTS_SEA_Norwegian_Institute_of_Marine_Research	https://doi.org/10.1594/PANGAEA.874087	76.4	22	10	1983	5	30	4.99	0.04	2.94
BARENTS_SEA_Norwegian_Institute_of_Marine_Research	https://doi.org/10.1594/PANGAEA.874087	76.4	22	10	1983	5	30	6.85	0.02	1.67
BARENTS_SEA_Norwegian_Institute_of_Marine_Research	https://doi.org/10.1594/PANGAEA.874087	76.4	22	10	1983	5	30	9.29	0.02	0.91
BARENTS_SEA_Norwegian_Institute_of_Marine_Research	https://doi.org/10.1594/PANGAEA.874087	76.4	22	10	1983	5	30	5.82	0.05	2.25
BARENTS_SEA_Norwegian_Institute_of_Marine_Research	https://doi.org/10.1594/PANGAEA.874087	76.67	29.68	15	1983	6	1	0.38	0.04	1.99
BARENTS_SEA_Norwegian_Institute_of_Marine_Research	https://doi.org/10.1594/PANGAEA.874087	76.67	29.68	40	1983	6	1	2.35	0.06	1.87
BARENTS_SEA_Norwegian_Institute_of_Marine_Research	https://doi.org/10.1594/PANGAEA.874087	76.67	31.68	35	1983	6	1	4.46	0.04	0.99
BARENTS_SEA_Norwegian_Institute_of_Marine_Research	https://doi.org/10.1594/PANGAEA.874087	76.67	34.98	33	1983	6	2	1.01	0.04	1.02
BARENTS_SEA_Norwegian_Institute_of_Marine_Research	https://doi.org/10.1594/PANGAEA.874087	76.67	37.02	0	1983	5	2	4.69	0.04	1.96
BARENTS_SEA_Norwegian_Institute_of_Marine_Research	https://doi.org/10.1594/PANGAEA.874087	76.67	37.02	17	1983	5	2	10.54	0.04	1.42
BARENTS_SEA_Norwegian_Institute_of_Marine_Research	https://doi.org/10.1594/PANGAEA.874087	77.5	36.23	20	1983	6	3	0.7	0.04	1.04
BARENTS_SEA_Norwegian_Institute_of_Marine_Research	https://doi.org/10.1594/PANGAEA.874087	77.5	36.23	10	1983	6	3	0.62	0.03	0.8
BARENTS_SEA_Norwegian_Institute_of_Marine_Research	https://doi.org/10.1594/PANGAEA.874087	77.03	32.48	22	1983	6	6	6.74	0.04	0.65
BARENTS_SEA_Norwegian_Institute_of_Marine_Research	https://doi.org/10.1594/PANGAEA.874087	77.03	32.48	45	1983	6	6	0.66	0.05	0.88
BARENTS_SEA_Norwegian_Institute_of_Marine_Research	https://doi.org/10.1594/PANGAEA.874087	77.03	32.48	30	1983	6	7	4.92	0.05	1.15
BARENTS_SEA_Norwegian_Institute_of_Marine_Research	https://doi.org/10.1594/PANGAEA.874087	76.67	33.07	26	1983	6	7	0.8	0.15	3.07
BARENTS_SEA_Norwegian_Institute_of_Marine_Research	https://doi.org/10.1594/PANGAEA.874087	76.67	33.07	10	1983	6	7	0.15	0.03	2.29
BARENTS_SEA_Norwegian_Institute_of_Marine_Research	https://doi.org/10.1594/PANGAEA.874087	76.67	33.07	40	1983	6	7	5.85	0.03	0.39
BARENTS_SEA_Norwegian_Institute_of_Marine_Research	https://doi.org/10.1594/PANGAEA.874087	76.67	33.07	27	1983	6	7	8.38	0.03	2.29
BARENTS_SEA_Norwegian_Institute_of_Marine_Research	https://doi.org/10.1594/PANGAEA.874087	76.67	33.07	10	1983	6	7	0.15	0.01	1.37
BARENTS_SEA_Norwegian_Institute_of_Marine_Research	https://doi.org/10.1594/PANGAEA.874087	76.67	33.07	40	1983	6	7	1.9	0.07	1.48
BARENTS_SEA_Norwegian_Institute_of_Marine_Research	https://doi.org/10.1594/PANGAEA.874087	76.67	33.07	10	1983	6	7	0.2	0.01	0.86
BARENTS_SEA_Norwegian_Institute_of_Marine_Research	https://doi.org/10.1594/PANGAEA.874087	76.67	33.07	40	1983	6	7	2.38	0.06	1.04
BARENTS_SEA_Norwegian_Institute_of_Marine_Research	https://doi.org/10.1594/PANGAEA.874087	77.38	29.57	20	1983	6	9	0.23	0.07	2.05
BARENTS_SEA_Norwegian_Institute_of_Marine_Research	https://doi.org/10.1594/PANGAEA.874087	77.4	29.8	20	1983	6	10	0.28	0.08	2.14
BARENTS_SEA_Norwegian_Institute_of_Marine_Research	https://doi.org/10.1594/PANGAEA.874087	77.43	29.7	20	1983	6	10	0.22	0.1	3.15
BARENTS_SEA_Norwegian_Institute_of_Marine_Research	https://doi.org/10.1594/PANGAEA.874087	77.22	29.37	80	1983	6	11	7.65	0.05	0.66
BARENTS_SEA_Norwegian_Institute_of_Marine_Research	https://doi.org/10.1594/PANGAEA.874087	76.58	26.47	0	1983	6	12	3.3	0.05	1.29
BARENTS_SEA_Norwegian_Institute_of_Marine_Research	https://doi.org/10.1594/PANGAEA.874087	75.25	15	5	1984	5	30	0.07	0.05	2.43
BARENTS_SEA_Norwegian_Institute_of_Marine_Research	https://doi.org/10.1594/PANGAEA.874087	75.25	18	5	1984	5	31	3.66	0.02	0.94
BARENTS_SEA_Norwegian_Institute_of_Marine_Research	https://doi.org/10.1594/PANGAEA.874087	75.25	19.43	5	1984	5	31	8.64	0.08	2.5
BARENTS_SEA_Norwegian_Institute_of_Marine_Research	https://doi.org/10.1594/PANGAEA.874087	74.73	22.73	20	1984	6	1	5.05	0.04	1.37
BARENTS_SEA_Norwegian_Institute_of_Marine_Research	https://doi.org/10.1594/PANGAEA.874087	74.37	23.93	20	1984	6	1	5.28	0.05	1.23
BARENTS_SEA_Norwegian_Institute_of_Marine_Research	https://doi.org/10.1594/PANGAEA.874087	77.17	33.48	5	1984	6	3	2.22	0.04	0.63
BARENTS_SEA_Norwegian_Institute_of_Marine_Research	https://doi.org/10.1594/PANGAEA.874087	77.17	33.48	25	1984	6	3	10.54	0.07	0.96
BARENTS_SEA_Norwegian_Institute_of_Marine_Research	https://doi.org/10.1594/PANGAEA.874087	76.8	33.13	5	1984	6	4	9.81	0.04	0.52
BARENTS_SEA_Norwegian_Institute_of_Marine_Research	https://doi.org/10.1594/PANGAEA.874087	76.8	33.13	25	1984	6	4	12.45	0.05	1.35
BARENTS_SEA_Norwegian_Institute_of_Marine_Research	https://doi.org/10.1594/PANGAEA.874087	75.83	32.42	10	1984	6	5	0.74	0.02	0.86
BARENTS_SEA_Norwegian_Institute_of_Marine_Research	https://doi.org/10.1594/PANGAEA.874087	75.83	32.42	40	1984	6	5	5.44	0.02	1.33
BARENTS_SEA_Norwegian_Institute_of_Marine_Research	https://doi.org/10.1594/PANGAEA.874087	76.33	44	10	1984	6	10	2.6	0.03	1.66
BARENTS_SEA_Norwegian_Institute_of_Marine_Research	https://doi.org/10.1594/PANGAEA.874087	74.37	23.9	10	1984	8	7	0.89	0.05	4.23
BARENTS_SEA_Norwegian_Institute_of_Marine_Research	https://doi.org/10.1594/PANGAEA.874087	75.25	21.1	10	1984	8	8	0.39	0.08	2.67
BARENTS_SEA_Norwegian_Institute_of_Marine_Research	https://doi.org/10.1594/PANGAEA.874087	75.25	18.5	10	1984	8	8	0.57	0.04	1.95
BARENTS_SEA_Norwegian_Institute_of_Marine_Research	https://doi.org/10.1594/PANGAEA.874087	75.25	16.05	10	1984	8	8	1	0.03	1.22
BARENTS_SEA_Norwegian_Institute_of_Marine_Research	https://doi.org/10.1594/PANGAEA.874087	75.75	17.22	10	1984	8	9	0.2	0.05	3.17
BARENTS_SEA_Norwegian_Institute_of_Marine_Research	https://doi.org/10.1594/PANGAEA.874087	76.25	18.43	10	1984	8	9	0.25	0.12	1.98
BARENTS_SEA_Norwegian_Institute_of_Marine_Research	https://doi.org/10.1594/PANGAEA.874087	76.25	18.43	35	1984	8	9	0.72	0.1	1.89
BARENTS_SEA_Norwegian_Institute_of_Marine_Research	https://doi.org/10.1594/PANGAEA.874087	76.25	24.75	10	1984	8	9	0.28	0.04	1.56
BARENTS_SEA_Norwegian_Institute_of_Marine_Research	https://doi.org/10.1594/PANGAEA.874087	76.25	24.75	35	1984	8	9	0.28	0.14	1.87
BARENTS_SEA_Norwegian_Institute_of_Marine_Research	https://doi.org/10.1594/PANGAEA.874087	76	20.45	10	1984	8	10	0.33	0.03	0.98
BARENTS_SEA_Norwegian_Institute_of_Marine_Research	https://doi.org/10.1594/PANGAEA.874087	76	20.45	25	1984	8	10	1.07	0.05	1.25
BARENTS_SEA_Norwegian_Institute_of_Marine_Research	https://doi.org/10.1594/PANGAEA.874087	75.48	29.6	10	1984	8	11	2.63	0.04	1.34
BARENTS_SEA_Norwegian_Institute_of_Marine_Research	https://doi.org/10.1594/PANGAEA.874087	75.48	29.6	45	1984	8	11	0.21	0.14	2.39
BARENTS_SEA_Norwegian_Institute_of_Marine_Research	https://doi.org/10.1594/PANGAEA.874087	75.75	32.37	10	1984	8	12	1.31	0.07	1.21
BARENTS_SEA_Norwegian_Institute_of_Marine_Research	https://doi.org/10.1594/PANGAEA.874087	75.75	32.37	30	1984	8	12	1.04	0.1	2.44
BARENTS_SEA_Norwegian_Institute_of_Marine_Research	https://doi.org/10.1594/PANGAEA.874087	74.5	32.95	10	1984	8	12	0.16	0.05	1.93
BARENTS_SEA_Norwegian_Institute_of_Marine_Research	https://doi.org/10.1594/PANGAEA.874087	74.5	32.95	33	1984	8	12	1.09	0.04	0.95
BARENTS_SEA_Norwegian_Institute_of_Marine_Research	https://doi.org/10.1594/PANGAEA.874087	78	34.2	33	1984	8	14	4.3	0.01	0.36
BARENTS_SEA_Norwegian_Institute_of_Marine_Research	https://doi.org/10.1594/PANGAEA.874087	78	34.2	57	1984	8	14	0.81	0.06	0.6
BARENTS_SEA_Norwegian_Institute_of_Marine_Research	https://doi.org/10.1594/PANGAEA.874087	78	45.03	25	1984	8	15	1.05	0.04	0.56
BARENTS_SEA_Norwegian_Institute_of_Marine_Research	https://doi.org/10.1594/PANGAEA.874087	78	45.03	48	1984	8	15	0.54	0.04	0.69
BARENTS_SEA_Norwegian_Institute_of_Marine_Research	https://doi.org/10.1594/PANGAEA.874087	77.25	45	38	1984	8	15	0.96	0.11	1.04
BARENTS_SEA_Norwegian_Institute_of_Marine_Research	https://doi.org/10.1594/PANGAEA.874087	76.48	44.9	45	1984	8	16	1.24	0.04	0.51
BARENTS_SEA_Norwegian_Institute_of_Marine_Research	https://doi.org/10.1594/PANGAEA.874087	75.75	44.98	4	1984	8	16	0.31	0.04	1.27
BARENTS_SEA_Norwegian_Institute_of_Marine_Research	https://doi.org/10.1594/PANGAEA.874087	74	44.9	35	1984	8	17	0.49	0.06	1.67
BARENTS_SEA_Norwegian_Institute_of_Marine_Research	https://doi.org/10.1594/PANGAEA.874087	74.55	23.33	10	1985	8	3	0.4	0.04	1.66
BARENTS_SEA_Norwegian_Institute_of_Marine_Research	https://doi.org/10.1594/PANGAEA.874087	74.55	23.33	25	1985	8	3	0.32	0.04	1.27
BARENTS_SEA_Norwegian_Institute_of_Marine_Research	https://doi.org/10.1594/PANGAEA.874087	74.55	23.33	35	1985	8	3	1.07	0.05	1.51
BARENTS_SEA_Norwegian_Institute_of_Marine_Research	https://doi.org/10.1594/PANGAEA.874087	75.25	28.67	30	1985	8	4	0.5	0.04	2.06
BARENTS_SEA_Norwegian_Institute_of_Marine_Research	https://doi.org/10.1594/PANGAEA.874087	75.25	28.67	50	1985	8	4	0.58	0.07	1.09
BARENTS_SEA_Norwegian_Institute_of_Marine_Research	https://doi.org/10.1594/PANGAEA.874087	74.75	35	10	1985	8	6	0.48	0.03	1.17
BARENTS_SEA_Norwegian_Institute_of_Marine_Research	https://doi.org/10.1594/PANGAEA.874087	74.75	35	35	1985	8	6	0.85	0.04	1.24
BARENTS_SEA_Norwegian_Institute_of_Marine_Research	https://doi.org/10.1594/PANGAEA.874087	74.75	35	45	1985	8	6	1.49	0.03	0.85
BARENTS_SEA_Norwegian_Institute_of_Marine_Research	https://doi.org/10.1594/PANGAEA.874087	77.25	35	10	1985	8	7	0.18	0.04	2.25
BARENTS_SEA_Norwegian_Institute_of_Marine_Research	https://doi.org/10.1594/PANGAEA.874087	77.25	35	30	1985	8	7	0.94	0.02	1.11
BARENTS_SEA_Norwegian_Institute_of_Marine_Research	https://doi.org/10.1594/PANGAEA.874087	77.25	35	40	1985	8	7	4.42	0.04	0.59
BARENTS_SEA_Norwegian_Institute_of_Marine_Research	https://doi.org/10.1594/PANGAEA.874087	77.25	35	60	1985	8	7	0.77	0.04	0.74
BARENTS_SEA_Norwegian_Institute_of_Marine_Research	https://doi.org/10.1594/PANGAEA.874087	77.38	28	10	1985	8	8	0.46	0.03	1.49
BARENTS_SEA_Norwegian_Institute_of_Marine_Research	https://doi.org/10.1594/PANGAEA.874087	77.38	28	20	1985	8	8	1.7	0.04	1.75
BARENTS_SEA_Norwegian_Institute_of_Marine_Research	https://doi.org/10.1594/PANGAEA.874087	77.38	28	30	1985	8	8	0.28	0.04	1.29
BARENTS_SEA_Norwegian_Institute_of_Marine_Research	https://doi.org/10.1594/PANGAEA.874087	76.5	32	10	1985	8	10	0.2	0.02	1.74
BARENTS_SEA_Norwegian_Institute_of_Marine_Research	https://doi.org/10.1594/PANGAEA.874087	76.5	32	40	1985	8	10	0.2	0.16	4.21
BARENTS_SEA_Norwegian_Institute_of_Marine_Research	https://doi.org/10.1594/PANGAEA.874087	76.5	32	50	1985	8	10	0.45	0.06	1.07
BARENTS_SEA_Norwegian_Institute_of_Marine_Research	https://doi.org/10.1594/PANGAEA.874087	76.75	32.67	10	1985	8	11	0.27	0.03	2.14
BARENTS_SEA_Norwegian_Institute_of_Marine_Research	https://doi.org/10.1594/PANGAEA.874087	76.75	32.67	20	1985	8	11	0.98	0.05	1.51
BARENTS_SEA_Norwegian_Institute_of_Marine_Research	https://doi.org/10.1594/PANGAEA.874087	76.75	32.67	40	1985	8	11	0.3	0.07	1.26
BARENTS_SEA_Norwegian_Institute_of_Marine_Research	https://doi.org/10.1594/PANGAEA.874087	78.58	28.48	10	1985	8	12	0.64	0.04	1.48
BARENTS_SEA_Norwegian_Institute_of_Marine_Research	https://doi.org/10.1594/PANGAEA.874087	78.58	28.48	28	1985	8	12	1.13	0.03	0.71
BARENTS_SEA_Norwegian_Institute_of_Marine_Research	https://doi.org/10.1594/PANGAEA.874087	78.58	28.48	35	1985	8	12	2.17	0.03	0.51
BARENTS_SEA_Norwegian_Institute_of_Marine_Research	https://doi.org/10.1594/PANGAEA.874087	78.35	41.25	10	1985	8	13	0.14	0.05	1.95
BARENTS_SEA_Norwegian_Institute_of_Marine_Research	https://doi.org/10.1594/PANGAEA.874087	78.35	41.25	30	1985	8	13	1.24	0.02	0.67
BARENTS_SEA_Norwegian_Institute_of_Marine_Research	https://doi.org/10.1594/PANGAEA.874087	78.35	41.25	35	1985	8	13	2.5	0.02	0.37
BARENTS_SEA_Norwegian_Institute_of_Marine_Research	https://doi.org/10.1594/PANGAEA.874087	78.35	41.25	39	1985	8	13	2.8	0.04	0.58
BARENTS_SEA_Norwegian_Institute_of_Marine_Research	https://doi.org/10.1594/PANGAEA.874087	75.15	22.7	10	1986	4	4	0.14	0.03	0.5
BARENTS_SEA_Norwegian_Institute_of_Marine_Research	https://doi.org/10.1594/PANGAEA.874087	75.15	22.7	30	1986	4	4	0.15	0.06	0.91
BARENTS_SEA_Norwegian_Institute_of_Marine_Research	https://doi.org/10.1594/PANGAEA.874087	76.28	20.98	10	1986	4	6	0.3	0.04	1.7
BARENTS_SEA_Norwegian_Institute_of_Marine_Research	https://doi.org/10.1594/PANGAEA.874087	76.28	20.98	50	1986	4	6	0.25	0.05	2.13
BARENTS_SEA_Norwegian_Institute_of_Marine_Research	https://doi.org/10.1594/PANGAEA.874087	75.05	28.67	10	1986	4	8	5.61	0.02	2.12
BARENTS_SEA_Norwegian_Institute_of_Marine_Research	https://doi.org/10.1594/PANGAEA.874087	75.05	28.67	50	1986	4	8	3.68	0.02	1.84
BARENTS_SEA_Norwegian_Institute_of_Marine_Research	https://doi.org/10.1594/PANGAEA.874087	75.48	32.1	10	1986	4	10	0.47	0.06	1.79
BARENTS_SEA_Norwegian_Institute_of_Marine_Research	https://doi.org/10.1594/PANGAEA.874087	75.48	32.1	40	1986	4	10	0.36	0.1	1.59
BARENTS_SEA_Norwegian_Institute_of_Marine_Research	https://doi.org/10.1594/PANGAEA.874087	75.33	29.43	10	1986	4	11	5.05	0.04	2.06
BARENTS_SEA_Norwegian_Institute_of_Marine_Research	https://doi.org/10.1594/PANGAEA.874087	75.33	29.43	30	1986	4	11	5.15	0.03	2.25
BARENTS_SEA_Norwegian_Institute_of_Marine_Research	https://doi.org/10.1594/PANGAEA.874087	74	27.18	10	1986	4	15	0.36	0.03	2.17
BARENTS_SEA_Norwegian_Institute_of_Marine_Research	https://doi.org/10.1594/PANGAEA.874087	74	27.18	30	1986	4	15	0.54	0.05	2.17
BARENTS_SEA_Norwegian_Institute_of_Marine_Research	https://doi.org/10.1594/PANGAEA.874087	74.97	27.77	10	1986	4	16	8.28	0.04	2.15
BARENTS_SEA_Norwegian_Institute_of_Marine_Research	https://doi.org/10.1594/PANGAEA.874087	74.97	27.77	30	1986	4	16	8.17	0.04	2.74
BARENTS_SEA_Norwegian_Institute_of_Marine_Research	https://doi.org/10.1594/PANGAEA.874087	75.43	34.25	0	1986	4	20	1.8	0.05	1.73
BARENTS_SEA_Norwegian_Institute_of_Marine_Research	https://doi.org/10.1594/PANGAEA.874087	75.43	34.25	10	1986	4	20	1.59	0.03	1.64
BARENTS_SEA_Norwegian_Institute_of_Marine_Research	https://doi.org/10.1594/PANGAEA.874087	75.43	34.25	30	1986	4	20	1.52	0.04	1.61
BARENTS_SEA_Norwegian_Institute_of_Marine_Research	https://doi.org/10.1594/PANGAEA.874087	74.9	32.98	10	1986	4	17	2.13	0.04	1.86
BARENTS_SEA_Norwegian_Institute_of_Marine_Research	https://doi.org/10.1594/PANGAEA.874087	74.9	32.98	30	1986	4	17	2.02	0.05	2.13
BARENTS_SEA_Norwegian_Institute_of_Marine_Research	https://doi.org/10.1594/PANGAEA.874087	75.22	31.97	10	1986	4	18	0.89	0.02	0.57
BARENTS_SEA_Norwegian_Institute_of_Marine_Research	https://doi.org/10.1594/PANGAEA.874087	75.22	31.97	40	1986	4	18	0.48	0.06	3.15
BARENTS_SEA_Norwegian_Institute_of_Marine_Research	https://doi.org/10.1594/PANGAEA.874087	75.9	30.75	10	1986	4	19	1.07	0.02	1.49
BARENTS_SEA_Norwegian_Institute_of_Marine_Research	https://doi.org/10.1594/PANGAEA.874087	75.9	30.75	40	1986	4	19	1.12	0.03	2.05
BARENTS_SEA_Norwegian_Institute_of_Marine_Research	https://doi.org/10.1594/PANGAEA.874087	75.43	33.7	10	1986	4	20	1.29	0.04	1.75
BARENTS_SEA_Norwegian_Institute_of_Marine_Research	https://doi.org/10.1594/PANGAEA.874087	75.43	33.7	40	1986	4	20	1.51	0.03	1.8
BARENTS_SEA_Norwegian_Institute_of_Marine_Research	https://doi.org/10.1594/PANGAEA.874087	74.97	27.83	10	1986	4	21	8.83	0.04	2.07
BARENTS_SEA_Norwegian_Institute_of_Marine_Research	https://doi.org/10.1594/PANGAEA.874087	74.97	27.83	40	1986	4	21	7.83	0.04	1.79
BARENTS_SEA_Norwegian_Institute_of_Marine_Research	https://doi.org/10.1594/PANGAEA.874087	75.25	23.52	30	1987	2	27	0.01	0.14	0.78
BARENTS_SEA_Norwegian_Institute_of_Marine_Research	https://doi.org/10.1594/PANGAEA.874087	75.33	23.83	10	1987	2	28	0.02	0.06	1.01
BARENTS_SEA_Norwegian_Institute_of_Marine_Research	https://doi.org/10.1594/PANGAEA.874087	75.33	23.83	50	1987	2	28	0.02	0.07	0.9
BARENTS_SEA_Norwegian_Institute_of_Marine_Research	https://doi.org/10.1594/PANGAEA.874087	76.6	30.17	10	1987	3	3	0.02	0.13	1.99
BARENTS_SEA_Norwegian_Institute_of_Marine_Research	https://doi.org/10.1594/PANGAEA.874087	76.6	30.17	50	1987	3	3	0.01	0.09	4.05
BARENTS_SEA_Norwegian_Institute_of_Marine_Research	https://doi.org/10.1594/PANGAEA.874087	76.08	23.67	10	1987	3	5	0.04	0.03	0.27
BARENTS_SEA_Norwegian_Institute_of_Marine_Research	https://doi.org/10.1594/PANGAEA.874087	76.08	23.67	30	1987	3	5	0.02	0.08	0.32
BARENTS_SEA_Norwegian_Institute_of_Marine_Research	https://doi.org/10.1594/PANGAEA.874087	76.35	21.33	10	1987	3	6	0.02	0.05	2.14
BARENTS_SEA_Norwegian_Institute_of_Marine_Research	https://doi.org/10.1594/PANGAEA.874087	75.75	32.28	10	1987	5	23	0.56	0.01	0.55
BARENTS_SEA_Norwegian_Institute_of_Marine_Research	https://doi.org/10.1594/PANGAEA.874087	75.5	26.65	10	1987	5	25	3.58	0.04	2.87
BARENTS_SEA_Norwegian_Institute_of_Marine_Research	https://doi.org/10.1594/PANGAEA.874087	75.5	26.65	30	1987	5	25	4.69	0.03	2.28
BARENTS_SEA_Norwegian_Institute_of_Marine_Research	https://doi.org/10.1594/PANGAEA.874087	75.5	26.65	60	1987	5	25	3.58	0.04	2.27
BARENTS_SEA_Norwegian_Institute_of_Marine_Research	https://doi.org/10.1594/PANGAEA.874087	75	28.5	10	1987	5	27	5.43	0.04	1.33
BARENTS_SEA_Norwegian_Institute_of_Marine_Research	https://doi.org/10.1594/PANGAEA.874087	75	28.5	30	1987	5	27	4.14	0.05	1.74
BARENTS_SEA_Norwegian_Institute_of_Marine_Research	https://doi.org/10.1594/PANGAEA.874087	75	28.5	50	1987	5	27	4.07	0.04	1.54
BARENTS_SEA_Norwegian_Institute_of_Marine_Research	https://doi.org/10.1594/PANGAEA.874087	75.03	28.62	10	1987	6	2	5.09	0.02	0.91
BARENTS_SEA_Norwegian_Institute_of_Marine_Research	https://doi.org/10.1594/PANGAEA.874087	75.03	28.62	30	1987	6	2	3.49	0.03	1.16
BARENTS_SEA_Norwegian_Institute_of_Marine_Research	https://doi.org/10.1594/PANGAEA.874087	75.03	28.62	70	1987	6	2	1.95	0.02	0.96
BARENTS_SEA_Norwegian_Institute_of_Marine_Research	https://doi.org/10.1594/PANGAEA.874087	75.03	28.62	90	1987	6	2	1.89	0.01	0.66
BARENTS_SEA_Norwegian_Institute_of_Marine_Research	https://doi.org/10.1594/PANGAEA.874087	75.28	32.3	10	1987	6	3	0.22	0.02	1.42
BARENTS_SEA_Norwegian_Institute_of_Marine_Research	https://doi.org/10.1594/PANGAEA.874087	75.28	32.3	40	1987	6	3	4.78	0.02	0.62
BARENTS_SEA_Norwegian_Institute_of_Marine_Research	https://doi.org/10.1594/PANGAEA.874087	75.28	32.3	50	1987	6	3	4.05	0.02	0.37
BARENTS_SEA_Norwegian_Institute_of_Marine_Research	https://doi.org/10.1594/PANGAEA.874087	75.5	25.33	10	1987	6	5	0.57	0.01	1.02
BARENTS_SEA_Norwegian_Institute_of_Marine_Research	https://doi.org/10.1594/PANGAEA.874087	75.5	25.33	30	1987	6	5	4.13	0.03	0.99
BARENTS_SEA_Norwegian_Institute_of_Marine_Research	https://doi.org/10.1594/PANGAEA.874087	75.5	25.33	40	1987	6	5	3.26	0.02	0.76
BARENTS_SEA_Norwegian_Institute_of_Marine_Research	https://doi.org/10.1594/PANGAEA.874087	75.5	25.33	50	1987	6	5	1.57	0.02	0.93
BARENTS_SEA_Norwegian_Institute_of_Marine_Research	https://doi.org/10.1594/PANGAEA.874087	74.82	23.58	0	1987	6	6	2.67	0.05	2.53
BARENTS_SEA_Norwegian_Institute_of_Marine_Research	https://doi.org/10.1594/PANGAEA.874087	74.82	23.58	10	1987	6	6	3.63	0.03	2.08
BARENTS_SEA_Norwegian_Institute_of_Marine_Research	https://doi.org/10.1594/PANGAEA.874087	74.82	23.58	30	1987	6	6	3.26	0.04	2.46
BARENTS_SEA_Norwegian_Institute_of_Marine_Research	https://doi.org/10.1594/PANGAEA.874087	74.82	23.58	50	1987	6	6	3.43	0.02	1.18
BARENTS_SEA_Norwegian_Institute_of_Marine_Research	https://doi.org/10.1594/PANGAEA.874087	75	28.62	0	1987	6	7	4.3	0.02	1.6
BARENTS_SEA_Norwegian_Institute_of_Marine_Research	https://doi.org/10.1594/PANGAEA.874087	75	28.62	10	1987	6	7	4.42	0.02	1.3
BARENTS_SEA_Norwegian_Institute_of_Marine_Research	https://doi.org/10.1594/PANGAEA.874087	75	28.62	30	1987	6	7	4.07	0.02	1.24
BARENTS_SEA_Norwegian_Institute_of_Marine_Research	https://doi.org/10.1594/PANGAEA.874087	75	28.62	70	1987	6	7	3.84	0.01	0.5
BARENTS_SEA_Norwegian_Institute_of_Marine_Research	https://doi.org/10.1594/PANGAEA.874087	74.5	31.52	0	1987	6	8	0.59	0.02	1
BARENTS_SEA_Norwegian_Institute_of_Marine_Research	https://doi.org/10.1594/PANGAEA.874087	74.5	31.52	10	1987	6	8	0.59	0.01	0.82
BARENTS_SEA_Norwegian_Institute_of_Marine_Research	https://doi.org/10.1594/PANGAEA.874087	74.5	31.52	43	1987	6	8	5.7	0.02	1.32
BARENTS_SEA_Norwegian_Institute_of_Marine_Research	https://doi.org/10.1594/PANGAEA.874087	74.5	31.52	60	1987	6	8	1.27	0.02	0.42
BARENTS_SEA_Norwegian_Institute_of_Marine_Research	https://doi.org/10.1594/PANGAEA.874087	73.33	18	0	1989	5	14	2.48	0.06	3.81
BARENTS_SEA_Norwegian_Institute_of_Marine_Research	https://doi.org/10.1594/PANGAEA.874087	73.33	18	10	1989	5	14	2.96	0.05	2.48
BARENTS_SEA_Norwegian_Institute_of_Marine_Research	https://doi.org/10.1594/PANGAEA.874087	73.33	18	20	1989	5	14	3.72	0.03	1.95
BARENTS_SEA_Norwegian_Institute_of_Marine_Research	https://doi.org/10.1594/PANGAEA.874087	73.33	18	30	1989	5	14	2.39	0.05	2.49
BARENTS_SEA_Norwegian_Institute_of_Marine_Research	https://doi.org/10.1594/PANGAEA.874087	72.5	18.33	0	1989	5	15	2.72	0.04	2.39
BARENTS_SEA_Norwegian_Institute_of_Marine_Research	https://doi.org/10.1594/PANGAEA.874087	72.5	18.33	10	1989	5	15	1.88	0.04	2.81
BARENTS_SEA_Norwegian_Institute_of_Marine_Research	https://doi.org/10.1594/PANGAEA.874087	72.5	18.33	20	1989	5	15	2.17	0.03	2.42
BARENTS_SEA_Norwegian_Institute_of_Marine_Research	https://doi.org/10.1594/PANGAEA.874087	72.5	18.33	30	1989	5	15	2.88	0.03	1.98
BARENTS_SEA_Norwegian_Institute_of_Marine_Research	https://doi.org/10.1594/PANGAEA.874087	74.67	25	10	1989	5	19	1.93	0.06	3.16
BARENTS_SEA_Norwegian_Institute_of_Marine_Research	https://doi.org/10.1594/PANGAEA.874087	74.67	25	30	1989	5	19	2.62	0.03	2.26
BARENTS_SEA_Norwegian_Institute_of_Marine_Research	https://doi.org/10.1594/PANGAEA.874087	74.67	25	50	1989	5	19	2.48	0.03	2.06
BARENTS_SEA_Norwegian_Institute_of_Marine_Research	https://doi.org/10.1594/PANGAEA.874087	74.67	25	100	1989	5	19	1.55	0.02	2
JR210-ICECHASER 2010 RRS James Clarke Ross	https://doi.org/10.1594/PANGAEA.874087	60.7431	2.72783	5	2010	6	15	0.886667	0.0389932	4.67021
JR210-ICECHASER 2010 RRS James Clarke Ross	https://doi.org/10.1594/PANGAEA.874087	60.7431	2.72783	18	2010	6	15	2.34333	0.0274778	5.04076
JR210-ICECHASER 2010 RRS James Clarke Ross	https://doi.org/10.1594/PANGAEA.874087	60.7431	2.72783	23	2010	6	15	1.79333	0.0430636	3.73222
JR210-ICECHASER 2010 RRS James Clarke Ross	https://doi.org/10.1594/PANGAEA.874087	65.0403	4.40033	5	2010	6	16	1.25	0.0546601	8.20583
JR210-ICECHASER 2010 RRS James Clarke Ross	https://doi.org/10.1594/PANGAEA.874087	65.0403	4.40033	15	2010	6	16	1.39333	0.0523307	6.26242
JR210-ICECHASER 2010 RRS James Clarke Ross	https://doi.org/10.1594/PANGAEA.874087	65.0403	4.40033	35	2010	6	16	0.466667	0.0612267	3.15929
JR210-ICECHASER 2010 RRS James Clarke Ross	https://doi.org/10.1594/PANGAEA.874087	69.341	6.37367	25	2010	6	17	1.38333	0.0308276	9.59511
JR210-ICECHASER 2010 RRS James Clarke Ross	https://doi.org/10.1594/PANGAEA.874087	69.341	6.37367	35	2010	6	17	0.41	0.0579974	2.66546
JR210-ICECHASER 2010 RRS James Clarke Ross	https://doi.org/10.1594/PANGAEA.874087	72.7536	8.2655	5	2010	6	18	0.723333	0.0384183	3.20477
JR210-ICECHASER 2010 RRS James Clarke Ross	https://doi.org/10.1594/PANGAEA.874087	72.7536	8.2655	18	2010	6	18	0.743333	0.0353515	3.82857
JR210-ICECHASER 2010 RRS James Clarke Ross	https://doi.org/10.1594/PANGAEA.874087	72.7536	8.2655	40	2010	6	18	0.14	0.0540621	2.33994
JR210-ICECHASER 2010 RRS James Clarke Ross	https://doi.org/10.1594/PANGAEA.874087	72.7536	11.2922	5	2010	6	19	3.9	0.0374466	4.04928
JR210-ICECHASER 2010 RRS James Clarke Ross	https://doi.org/10.1594/PANGAEA.874087	72.7536	11.2922	15	2010	6	19	4.9	0.0509465	3.92318
JR210-ICECHASER 2010 RRS James Clarke Ross	https://doi.org/10.1594/PANGAEA.874087	72.7536	11.2922	30	2010	6	19	0.853333	0.0525376	4.13813
JR210-ICECHASER 2010 RRS James Clarke Ross	https://doi.org/10.1594/PANGAEA.874087	80.6916	4.3181	5	2010	6	24	0.245	0.00890453	1.26245
JR210-ICECHASER 2010 RRS James Clarke Ross	https://doi.org/10.1594/PANGAEA.874087	80.6916	4.3181	5	2010	6	24	NA	0.0352641	1.9569
JR210-ICECHASER 2010 RRS James Clarke Ross	https://doi.org/10.1594/PANGAEA.874087	80.5182	4.16465	5	2010	6	26	NA	0.010032	0.91811
JR210-ICECHASER 2010 RRS James Clarke Ross	https://doi.org/10.1594/PANGAEA.874087	80.5182	4.16465	5	2010	6	26	0.18	0.00725672	0.81067
JR210-ICECHASER 2010 RRS James Clarke Ross	https://doi.org/10.1594/PANGAEA.874087	80.4553	3.71728	20	2010	6	27	0.283333	0.00807658	0.739387
JR210-ICECHASER 2010 RRS James Clarke Ross	https://doi.org/10.1594/PANGAEA.874087	80.4553	3.71728	30	2010	6	27	0.253333	0.0184337	0.920454
JR210-ICECHASER 2010 RRS James Clarke Ross	https://doi.org/10.1594/PANGAEA.874087	80.3163	3.32312	5	2010	6	28	0.19	0.0116167	0.997978
JR210-ICECHASER 2010 RRS James Clarke Ross	https://doi.org/10.1594/PANGAEA.874087	80.3163	3.32312	10	2010	6	28	0.32	0.0227872	0.746085
JR210-ICECHASER 2010 RRS James Clarke Ross	https://doi.org/10.1594/PANGAEA.874087	80.3163	3.32312	20	2010	6	28	0.286667	0.0180382	0.890045
JR210-ICECHASER 2010 RRS James Clarke Ross	https://doi.org/10.1594/PANGAEA.874087	80.2664	2.91913	10	2010	6	29	0.116667	0.0155915	1.23369
JR210-ICECHASER 2010 RRS James Clarke Ross	https://doi.org/10.1594/PANGAEA.874087	80.2297	2.16567	20	2010	7	1	0.993333	0.018864	1.68712
JR210-ICECHASER 2010 RRS James Clarke Ross	https://doi.org/10.1594/PANGAEA.874087	80.2297	2.16567	30	2010	7	1	2.81667	0.01024	0.757954
JR210-ICECHASER 2010 RRS James Clarke Ross	https://doi.org/10.1594/PANGAEA.874087	79.0167	10.7008	3.5	2010	7	4	0.203333	0.011136	1.86773
JR210-ICECHASER 2010 RRS James Clarke Ross	https://doi.org/10.1594/PANGAEA.874087	79.0167	10.7008	15	2010	7	4	0.246667	0.00944	0.873099
JR210-ICECHASER 2010 RRS James Clarke Ross	https://doi.org/10.1594/PANGAEA.874087	79.0152	10.688	25	2010	7	5	0.796667	0.0178521	0.546392
JR210-ICECHASER 2010 RRS James Clarke Ross	https://doi.org/10.1594/PANGAEA.874087	79.0152	10.688	32	2010	7	5	1	0.0254077	0.541004
JR210-ICECHASER 2010 RRS James Clarke Ross	https://doi.org/10.1594/PANGAEA.874087	78.9753	6.7065	5	2010	7	6	1.10667	0.0181854	1.60085
JR210-ICECHASER 2010 RRS James Clarke Ross	https://doi.org/10.1594/PANGAEA.874087	78.9753	6.7065	22	2010	7	6	1.91333	0.0249079	1.16947
JR210-ICECHASER 2010 RRS James Clarke Ross	https://doi.org/10.1594/PANGAEA.874087	78.9751	6.70632	5	2010	7	7	1.04667	0.0144585	1.6084
JR210-ICECHASER 2010 RRS James Clarke Ross	https://doi.org/10.1594/PANGAEA.874087	78.9751	6.70632	28	2010	7	7	1.085	0.0448711	1.32023
JR210-ICECHASER 2010 RRS James Clarke Ross	https://doi.org/10.1594/PANGAEA.874087	77.7772	5.59617	5	2010	7	8	1.07	0.0235805	0.944856
JR210-ICECHASER 2010 RRS James Clarke Ross	https://doi.org/10.1594/PANGAEA.874087	77.7772	5.59617	9	2010	7	8	1.56667	0.0211049	1.1755
JR210-ICECHASER 2010 RRS James Clarke Ross	https://doi.org/10.1594/PANGAEA.874087	77.7772	5.59617	14	2010	7	8	1.41333	0.0124	1.0945
JR210-ICECHASER 2010 RRS James Clarke Ross	https://doi.org/10.1594/PANGAEA.874087	77.6009	-5.19042	5	2010	7	9	0.463333	0.0264512	0.997785
JR210-ICECHASER 2010 RRS James Clarke Ross	https://doi.org/10.1594/PANGAEA.874087	77.6009	-5.19042	15	2010	7	9	0.403333	0.0274464	0.827095
JR210-ICECHASER 2010 RRS James Clarke Ross	https://doi.org/10.1594/PANGAEA.874087	78.2833	0.00025	5	2010	7	10	1.27333	0.0225995	1.17011
JR210-ICECHASER 2010 RRS James Clarke Ross	https://doi.org/10.1594/PANGAEA.874087	78.2833	0.00025	10	2010	7	10	5.14333	0.023968	1.09211
JR210-ICECHASER 2010 RRS James Clarke Ross	https://doi.org/10.1594/PANGAEA.874087	78.2833	0.00025	18	2010	7	10	2.17333	0.0230897	1.21066
JR288-ACCACIA RRS James Clarke Ross	https://doi.org/10.1594/PANGAEA.874087	68.0533	-17.6958	2	2013	7	18	1.783	0.01704	1.73873
JR288-ACCACIA RRS James Clarke Ross	https://doi.org/10.1594/PANGAEA.874087	68.0533	-17.6958	40	2013	7	18	1.517	0.01272	1.12277
JR288-ACCACIA RRS James Clarke Ross	https://doi.org/10.1594/PANGAEA.874087	68.0535	-17.5962	15	2013	7	18	2.28	0.01512	1.39883
JR288-ACCACIA RRS James Clarke Ross	https://doi.org/10.1594/PANGAEA.874087	70.2248	-20.695	30	2013	7	19	1.187	0.03696	0.736247
JR288-ACCACIA RRS James Clarke Ross	https://doi.org/10.1594/PANGAEA.874087	71.895	-20.3057	5	2013	7	21	0.747	0.01584	1.49341
JR288-ACCACIA RRS James Clarke Ross	https://doi.org/10.1594/PANGAEA.874087	71.895	-20.3057	20	2013	7	21	0.567	0.01944	1.12191
JR288-ACCACIA RRS James Clarke Ross	https://doi.org/10.1594/PANGAEA.874087	73.1057	-13.102	18	2013	7	22	0.933	0.02784	1.23486
JR288-ACCACIA RRS James Clarke Ross	https://doi.org/10.1594/PANGAEA.874087	73.1057	-13.102	35	2013	7	22	0.34	0.02328	0.762169
JR288-ACCACIA RRS James Clarke Ross	https://doi.org/10.1594/PANGAEA.874087	74.8102	-17.6018	5	2013	7	23	0.11	0.01248	1.88822
JR288-ACCACIA RRS James Clarke Ross	https://doi.org/10.1594/PANGAEA.874087	74.8102	-17.6018	10	2013	7	23	0.29	0.01464	1.16087
JR288-ACCACIA RRS James Clarke Ross	https://doi.org/10.1594/PANGAEA.874087	74.8102	-17.6018	30	2013	7	23	0.4	0.0192	0.994319
JR288-ACCACIA RRS James Clarke Ross	https://doi.org/10.1594/PANGAEA.874087	74.8102	-17.6018	40	2013	7	23	0.253	0.01416	0.67671
JR288-ACCACIA RRS James Clarke Ross	https://doi.org/10.1594/PANGAEA.874087	75.0493	-8.72501	10	2013	7	24	0.987	0.01896	1.28743
JR288-ACCACIA RRS James Clarke Ross	https://doi.org/10.1594/PANGAEA.874087	75.0493	-8.72501	25	2013	7	24	1.903	0.01512	0.967033
JR288-ACCACIA RRS James Clarke Ross	https://doi.org/10.1594/PANGAEA.874087	75.0528	-8.80566	35	2013	7	24	0.913	0.02472	0.777408
JR288-ACCACIA RRS James Clarke Ross	https://doi.org/10.1594/PANGAEA.874087	75.0528	-8.80566	45	2013	7	24	0.39	0.02232	0.804057
JR288-ACCACIA RRS James Clarke Ross	https://doi.org/10.1594/PANGAEA.874087	76.5317	-15.5223	2	2013	7	26	0.093	0.02208	1.58955
JR288-ACCACIA RRS James Clarke Ross	https://doi.org/10.1594/PANGAEA.874087	76.5317	-15.5223	20	2013	7	26	0.133	0.01968	1.25637
JR288-ACCACIA RRS James Clarke Ross	https://doi.org/10.1594/PANGAEA.874087	76.4915	-15.518	30	2013	7	26	0.37	0.05328	0.818133
JR288-ACCACIA RRS James Clarke Ross	https://doi.org/10.1594/PANGAEA.874087	76.4915	-15.518	40	2013	7	26	0.24	0.01584	0.505244
JR288-ACCACIA RRS James Clarke Ross	https://doi.org/10.1594/PANGAEA.874087	76.2697	-5.30899	10	2013	7	26	1.083	0.0192	0.82198
JR288-ACCACIA RRS James Clarke Ross	https://doi.org/10.1594/PANGAEA.874087	76.2697	-5.30899	20	2013	7	26	1.637	0.01536	0.61765
JR288-ACCACIA RRS James Clarke Ross	https://doi.org/10.1594/PANGAEA.874087	76.2697	-5.30899	27	2013	7	26	0.82	0.01536	0.508781
JR288-ACCACIA RRS James Clarke Ross	https://doi.org/10.1594/PANGAEA.874087	76.2362	-5.42816	40	2013	7	26	0.137	0.0252	0.764751
JR288-ACCACIA RRS James Clarke Ross	https://doi.org/10.1594/PANGAEA.874087	77.9563	-7.07199	5	2013	7	27	0.97	0.02424	1.21435
JR288-ACCACIA RRS James Clarke Ross	https://doi.org/10.1594/PANGAEA.874087	77.9563	-7.07199	15	2013	7	27	3.46	0.0228	1.07336
JR288-ACCACIA RRS James Clarke Ross	https://doi.org/10.1594/PANGAEA.874087	77.9813	-7.16983	20	2013	7	27	3.33	0.02136	0.515707
JR288-ACCACIA RRS James Clarke Ross	https://doi.org/10.1594/PANGAEA.874087	77.9813	-7.16983	25	2013	7	27	1.323	0.0276	0.49058
JR288-ACCACIA RRS James Clarke Ross	https://doi.org/10.1594/PANGAEA.874087	78.8943	-7.03317	15	2013	7	28	0.627	0.02688	0.612702
JR288-ACCACIA RRS James Clarke Ross	https://doi.org/10.1594/PANGAEA.874087	78.8943	-7.03317	28	2013	7	28	2.063	0.01272	0.473259
JR288-ACCACIA RRS James Clarke Ross	https://doi.org/10.1594/PANGAEA.874087	77.4538	-5.2175	13	2013	7	29	1.56	0.01272	0.778765
JR288-ACCACIA RRS James Clarke Ross	https://doi.org/10.1594/PANGAEA.874087	77.4427	3.4355	5	2013	7	30	1.477	0.02784	1.65268
JR288-ACCACIA RRS James Clarke Ross	https://doi.org/10.1594/PANGAEA.874087	77.4427	3.4355	15	2013	7	30	1.557	0.01656	1.72274
JR288-ACCACIA RRS James Clarke Ross	https://doi.org/10.1594/PANGAEA.874087	78.5323	5.37717	2	2013	9	1	2.61	0.0348	1.77824
JR288-ACCACIA RRS James Clarke Ross	https://doi.org/10.1594/PANGAEA.874087	78.5323	5.37717	25	2013	9	1	2.067	0.02304	1.08147
JR288-ACCACIA RRS James Clarke Ross	https://doi.org/10.1594/PANGAEA.874087	80.5838	10.7852	2	2013	9	2	3.037	0.01152	0.846615
JR288-ACCACIA RRS James Clarke Ross	https://doi.org/10.1594/PANGAEA.874087	80.5838	10.7852	15	2013	9	2	2.86	0.0324	1.10311
JR288-ACCACIA RRS James Clarke Ross	https://doi.org/10.1594/PANGAEA.874087	81.1335	24.1243	20	2013	9	3	0.51	0.0348	0.800228
JR288-ACCACIA RRS James Clarke Ross	https://doi.org/10.1594/PANGAEA.874087	81.1335	24.1243	30	2013	9	3	0.26	0.00648	0.334428
JR288-ACCACIA RRS James Clarke Ross	https://doi.org/10.1594/PANGAEA.874087	83.3105	33.7313	20	2013	9	4	0.283	0.04704	1.91316
JR288-ACCACIA RRS James Clarke Ross	https://doi.org/10.1594/PANGAEA.874087	83.3105	33.7313	29	2013	9	4	0.553	0.02616	0.496853
JR288-ACCACIA RRS James Clarke Ross	https://doi.org/10.1594/PANGAEA.874087	83.3105	33.7313	38	2013	9	4	0.703	0.04056	0.530037
JR288-ACCACIA RRS James Clarke Ross	https://doi.org/10.1594/PANGAEA.874087	83.1418	29.446	10	2013	9	4	1.14	0.0192	0.792705
JR288-ACCACIA RRS James Clarke Ross	https://doi.org/10.1594/PANGAEA.874087	83.1418	29.446	35	2013	9	4	0.61	0.02448	0.568974
JR288-ACCACIA RRS James Clarke Ross	https://doi.org/10.1594/PANGAEA.874087	82.6832	26.1282	5	2013	9	5	0.743	0.00936	0.881724
JR288-ACCACIA RRS James Clarke Ross	https://doi.org/10.1594/PANGAEA.874087	82.6832	26.1282	43	2013	9	5	0.41	0.024	0.465043
JR288-ACCACIA RRS James Clarke Ross	https://doi.org/10.1594/PANGAEA.874087	81	34.8322	15	2013	9	6	0.453	0.02016	0.601546
JR288-ACCACIA RRS James Clarke Ross	https://doi.org/10.1594/PANGAEA.874087	81	34.8322	30	2013	9	6	2.673	0.02088	0.456753
JR288-ACCACIA RRS James Clarke Ross	https://doi.org/10.1594/PANGAEA.874087	76.7465	9.37217	5	2013	9	9	1.18	0.05208	1.54557
