# Supplementary material for: Vertical structure in chlorophyll profiles: influence on primary production in the Arctic Ocean
Source: Philos Trans A Math Phys Eng Sci. 2020 Aug 31;378(2181):20190351. doi: 10.1098/rsta.2019.0351 (PMC7481674; doi:10.1098/rsta.2019.0351)
Supplement: Table S3 [file rsta20190351supp3.xlsx]

## Sheet: AVE_SPEC_BAR_LAB_GREEN2
Table S3 from Vertical Structure of Chlorophyll Profiles: Influence on Primary Production In the Arctic
Light absorption spectrum of Atlantic Arctic phytoplankton normalised to 440 nm used in the spectrally-resolved model of marine primary production.
Wavelength (nm)	a_ph(l)/a_ph(440)
400	0.764404
401	0.771403
402	0.779958
403	0.788708
404	0.797864
405	0.808769
406	0.818886
407	0.827792
408	0.838595
409	0.849414
410	0.859983
411	0.870285
412	0.878257
413	0.887653
414	0.89349
415	0.898518
416	0.903221
417	0.907764
418	0.911003
419	0.914174
420	0.915685
421	0.918021
422	0.921001
423	0.923275
424	0.925806
425	0.92875
426	0.93317
427	0.939295
428	0.945682
429	0.953413
430	0.961666
431	0.969794
432	0.977682
433	0.985141
434	0.992066
435	0.998058
436	1.00276
437	1.00539
438	1.00535
439	1.00283
440	1
441	0.994222
442	0.987418
443	0.97878
444	0.968602
445	0.95785
446	0.947068
447	0.936081
448	0.925627
449	0.916037
450	0.90797
451	0.900843
452	0.89383
453	0.889441
454	0.884758
455	0.881937
456	0.88022
457	0.878718
458	0.877637
459	0.87629
460	0.876901
461	0.876003
462	0.874036
463	0.873059
464	0.870531
465	0.867221
466	0.86285
467	0.858079
468	0.852329
469	0.845825
470	0.838965
471	0.830155
472	0.823199
473	0.81481
474	0.805189
475	0.795705
476	0.78562
477	0.775425
478	0.76598
479	0.756616
480	0.746591
481	0.736139
482	0.72541
483	0.713758
484	0.701289
485	0.689741
486	0.678086
487	0.666333
488	0.655895
489	0.644352
490	0.633614
491	0.621713
492	0.609552
493	0.598251
494	0.58556
495	0.573158
496	0.561774
497	0.549979
498	0.538769
499	0.528077
500	0.5175
501	0.507365
502	0.497105
503	0.487053
504	0.477731
505	0.468349
506	0.459464
507	0.450788
508	0.443126
509	0.435746
510	0.427744
511	0.420047
512	0.412608
513	0.405357
514	0.398529
515	0.391323
516	0.385159
517	0.378391
518	0.371218
519	0.364481
520	0.358524
521	0.352588
522	0.345928
523	0.339307
524	0.333515
525	0.327963
526	0.321719
527	0.31521
528	0.310244
529	0.304398
530	0.298407
531	0.293527
532	0.287346
533	0.281175
534	0.276315
535	0.271134
536	0.265554
537	0.260562
538	0.254923
539	0.250054
540	0.245184
541	0.239806
542	0.23462
543	0.229196
544	0.224398
545	0.220081
546	0.215216
547	0.210234
548	0.205297
549	0.20015
550	0.195166
551	0.190641
552	0.186208
553	0.181739
554	0.176897
555	0.172398
556	0.167853
557	0.163641
558	0.159589
559	0.155827
560	0.152485
561	0.148562
562	0.14465
563	0.141317
564	0.138802
565	0.136659
566	0.135623
567	0.134258
568	0.132282
569	0.131914
570	0.131328
571	0.13084
572	0.130497
573	0.130698
574	0.130717
575	0.130933
576	0.131168
577	0.131537
578	0.132225
579	0.133117
580	0.134639
581	0.135633
582	0.136559
583	0.137697
584	0.13828
585	0.13952
586	0.14117
587	0.141862
588	0.142286
589	0.142908
590	0.142896
591	0.142977
592	0.142316
593	0.142389
594	0.141639
595	0.140208
596	0.139174
597	0.137979
598	0.136554
599	0.135057
600	0.134049
601	0.133301
602	0.132255
603	0.131441
604	0.131641
605	0.131258
606	0.13153
607	0.131504
608	0.132029
609	0.133482
610	0.134591
611	0.1363
612	0.138281
613	0.14032
614	0.141556
615	0.143197
616	0.144993
617	0.14681
618	0.147268
619	0.148942
620	0.150204
621	0.151616
622	0.15268
623	0.153605
624	0.154531
625	0.155238
626	0.156102
627	0.157161
628	0.159518
629	0.16104
630	0.162722
631	0.165076
632	0.165482
633	0.167835
634	0.168912
635	0.16985
636	0.170909
637	0.171303
638	0.173324
639	0.17385
640	0.174266
641	0.17452
642	0.174608
643	0.174108
644	0.172914
645	0.172901
646	0.172752
647	0.172605
648	0.172947
649	0.173285
650	0.174955
651	0.175
652	0.177814
653	0.181269
654	0.185604
655	0.19127
656	0.197953
657	0.208163
658	0.218904
659	0.232384
660	0.246745
661	0.262948
662	0.280855
663	0.299351
664	0.319157
665	0.33961
666	0.360034
667	0.379696
668	0.397629
669	0.414555
670	0.429055
671	0.441601
672	0.450816
673	0.456401
674	0.459942
675	0.459005
676	0.454161
677	0.446702
678	0.435406
679	0.422823
680	0.405458
681	0.385305
682	0.363342
683	0.338698
684	0.312643
685	0.285713
686	0.260769
687	0.236011
688	0.211518
689	0.188904
690	0.168167
691	0.148949
692	0.131553
693	0.116502
694	0.103086
695	0.091629
696	0.0818041
697	0.0733895
698	0.0659747
699	0.0601839
700	0.0554251
